# Supplementary material
Source: PubMed Central journal article supplement (PMC9132228)
Supplement: MD-013-D1MD00374G-s001.pdf [file MD-013-D1MD00374G-s001.pdf]

## SUPPLEMENTARY DATA

### **Design, synthesis, and biological evaluation of new thalidomide-donepezil hybrids as neuroprotective agents targeting cholinesterases and neuroinflammation**

Cindy Juliet Cristancho Ortiz<sup>a</sup>, Matheus de Freitas Silva<sup>a</sup>, Letizia Pruccoli<sup>b</sup>, Nathália Fonseca Nadur<sup>c</sup>, Luciana Luiza de Azevedo<sup>c</sup>, Arthur Eugen Kümmerle<sup>c</sup>, Isabella Alvim Guedes<sup>d</sup>, Laurent Emmanuel Dardenne<sup>d</sup>, Luiz Felipe Leomil Coelho<sup>e</sup>, Marcos J. Guimarães<sup>f</sup>, Fernanda M. R. da Silva<sup>f</sup>, Newton Castro<sup>f</sup>, Vanessa Silva Gontijo<sup>a</sup>, Viviana C T Rojas<sup>g</sup>, Merelym Ketterym de Oliveira<sup>g</sup>, Fabiana Cardoso Vilela<sup>g</sup>, Alexandre Giusti-Paiva<sup>g</sup>, Gisele Barbosa<sup>h</sup>, Lídia Moreira Lima<sup>h</sup>, Gabriela Beserra Pinheiro<sup>i</sup>, Letícia Germino Veras<sup>i</sup>, Márcia Renata Mortari<sup>i</sup>, Andrea Tarozzi<sup>ab</sup> and Claudio Viegas Jr.<sup>\*a</sup>

### **Table of Contents**

|                                                   |    |
|---------------------------------------------------|----|
| <b>IR, NMR and HRMS Spectrum data</b> .....       | 1  |
| <b>Spectrum data of compounds 3a-h</b> .....      | 2  |
| <b>HPLC Chromatograms of compounds 3a-h</b> ..... | 18 |
| <b>PAMPA BBB assay</b> .....                      | 23 |

### **IR, NMR and HRMS Spectrum data**

All compounds were characterized by IR, NMR and HRMS techniques, also the purity was determined by HPLC. The spectra of the synthesized compounds are shown below

### Spectrum data of compounds 3a-h

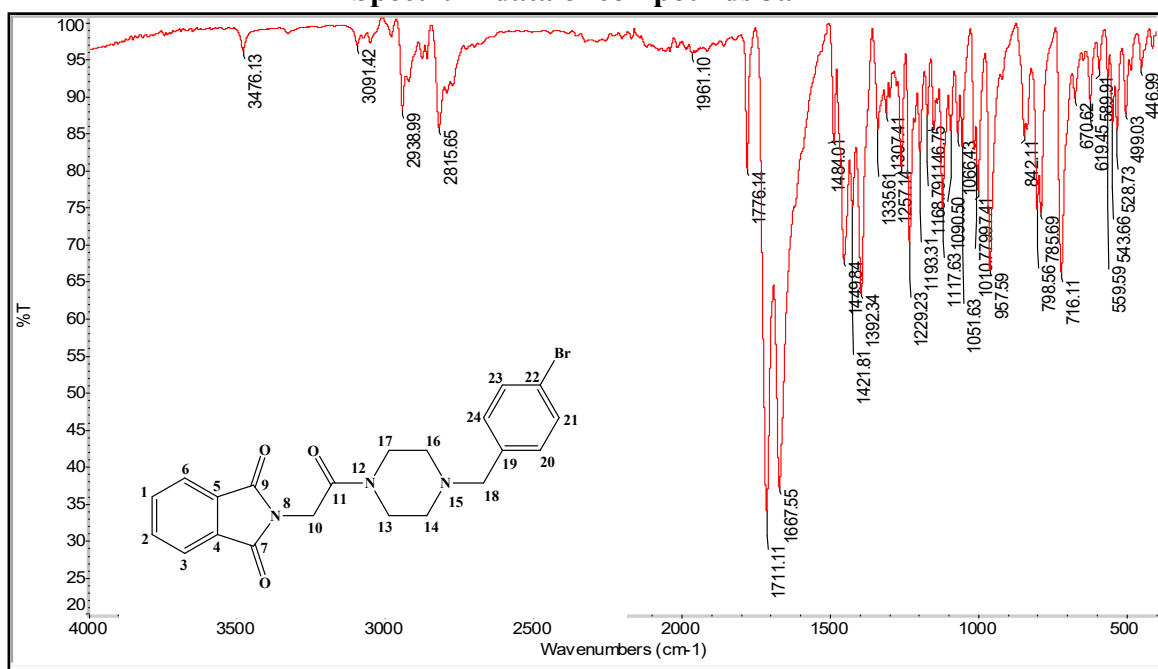

**Figure 1.** Absorption spectra in the infrared region 2-(2-(4-(4-bromobenzyl)piperazin-1-yl)-2-oxoethyl)isoindoline-1,3-dione (**3a**) (ATR).

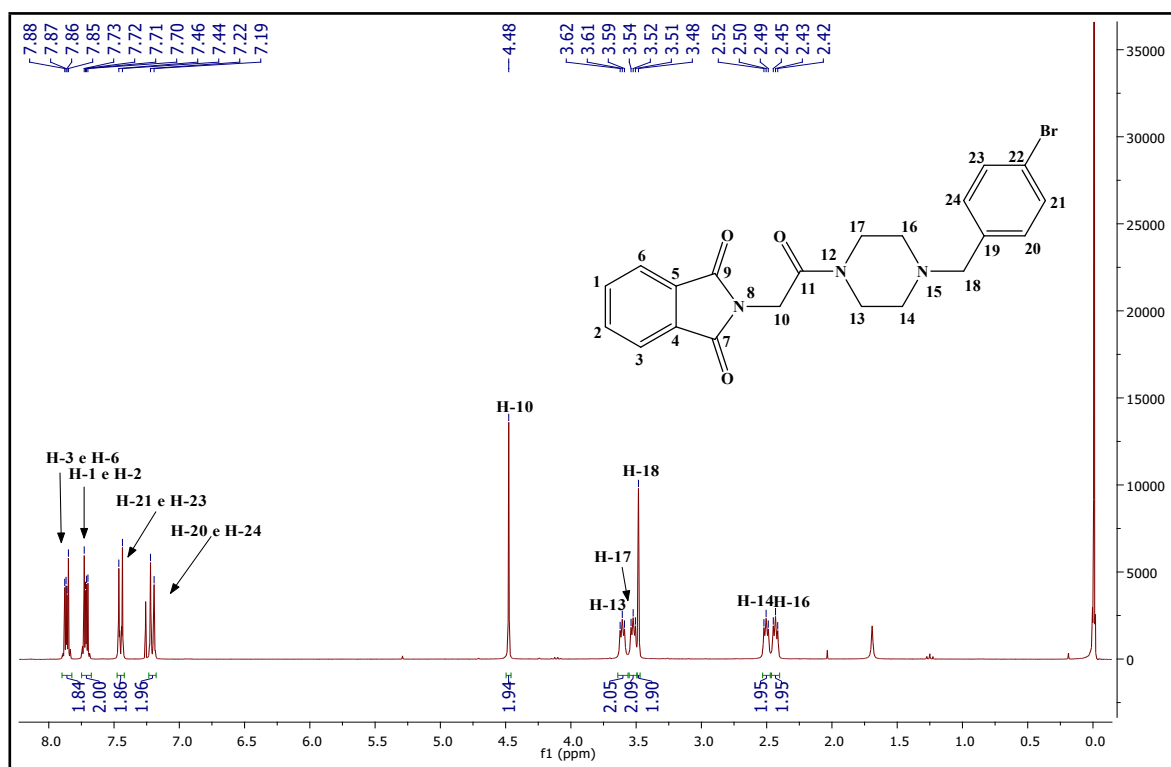

**Figure 2.** <sup>1</sup>H NMR spectra of 2-(2-(4-(4-bromobenzyl)piperazin-1-yl)-2-oxoethyl)isoindoline-1,3-dione (**3a**) (300 MHz, CDCl<sub>3</sub>).

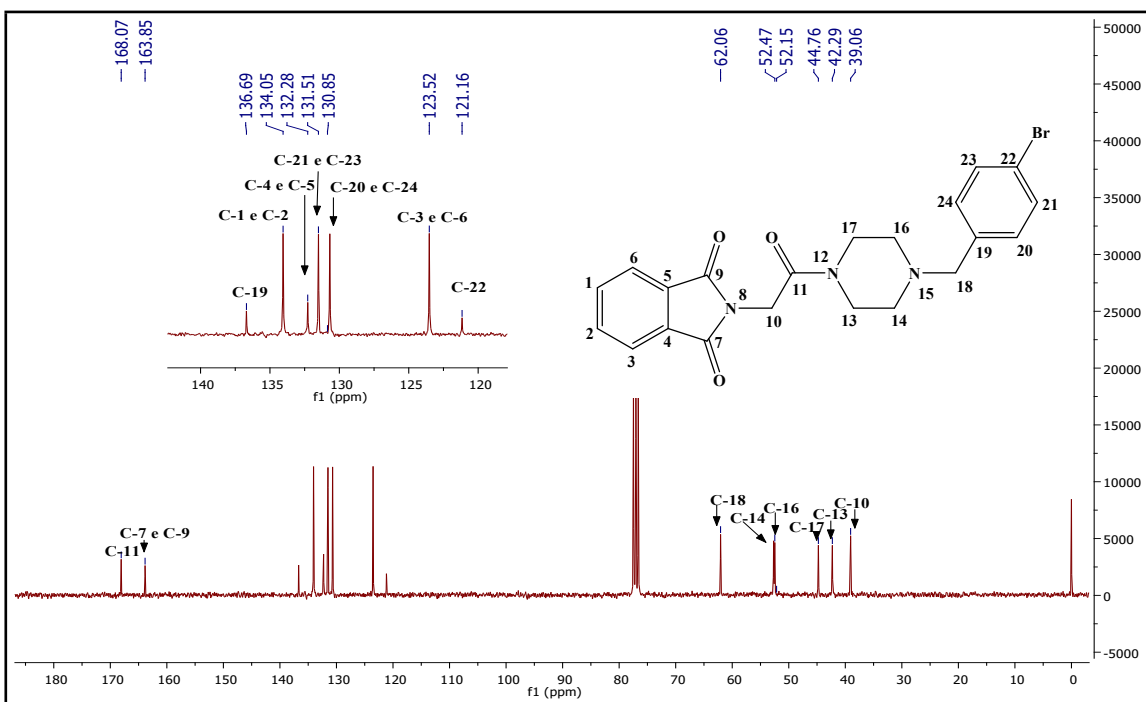

**Figure 3.**  $^{13}\text{C}$  NMR spectra of (E)-3-(4-hydroxy-3-methylphenyl)acrylohydrazide (**6a**) (75 MHz,  $\text{CDCl}_3$ ).

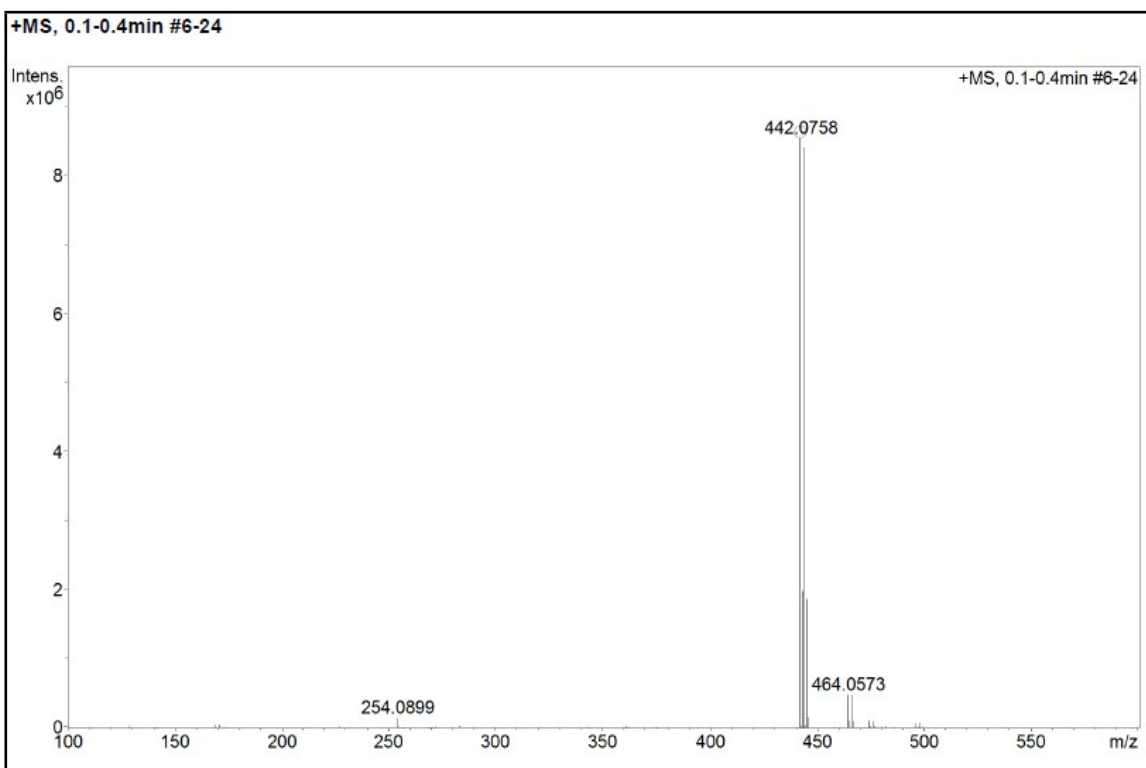

**Figure 4.** HR-MS spectra of 2-(2-(4-(4-bromobenzyl)piperazin-1-yl)-2-oxoethyl)isoindoline-1,3-dione (**3a**) (ESI-MS).

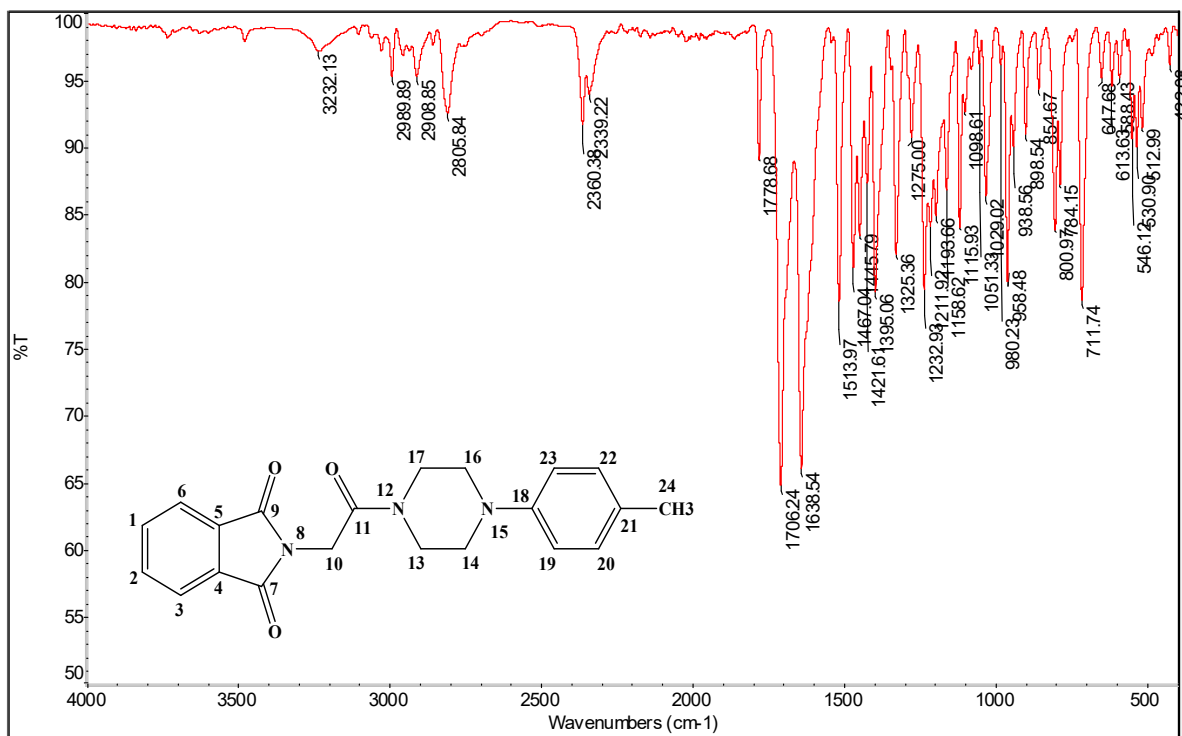

**Figure 5.** Absorption spectra in the infrared region of 2-(2-oxo-2-(4-(p-tolyl)piperazin-1-yl)ethyl)isoindoline-1,3-dione (**3b**) (ATR).

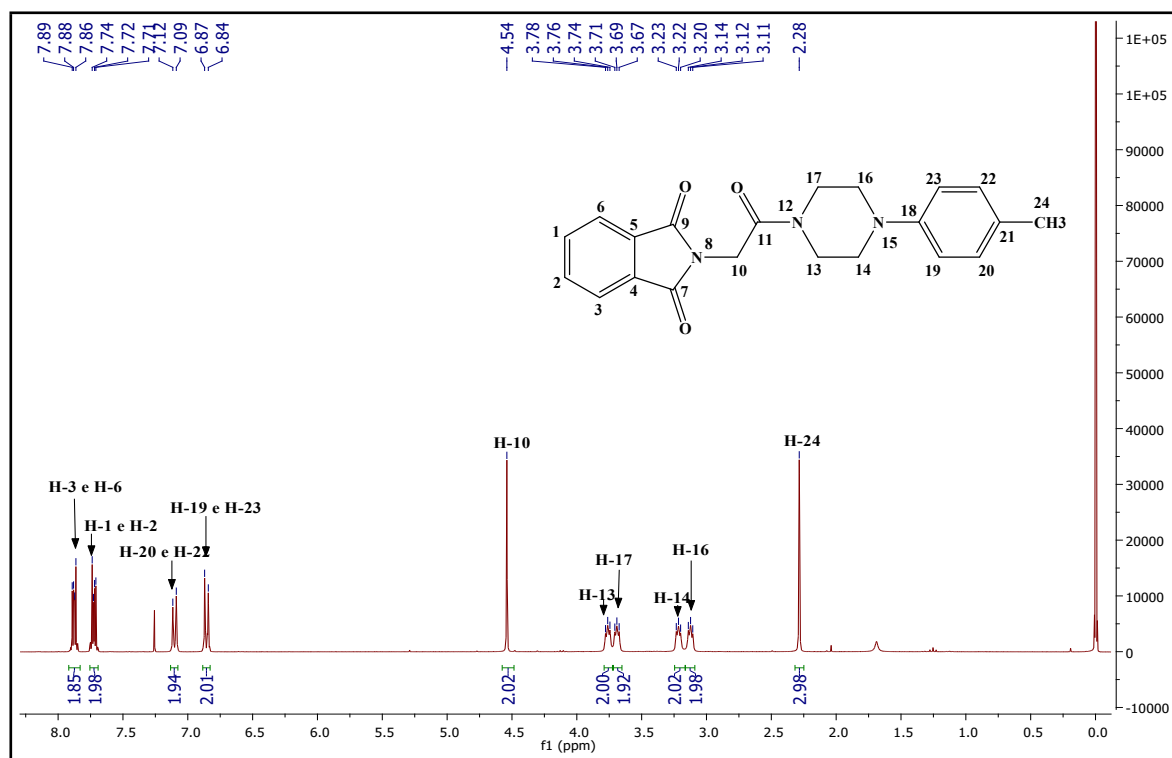

**Figure 6.** <sup>1</sup>H NMR spectra of 2-(2-oxo-2-(4-(p-tolyl)piperazin-1-yl)ethyl)isoindoline-1,3-dione (**3b**) (300 MHz, CDCl<sub>3</sub>).

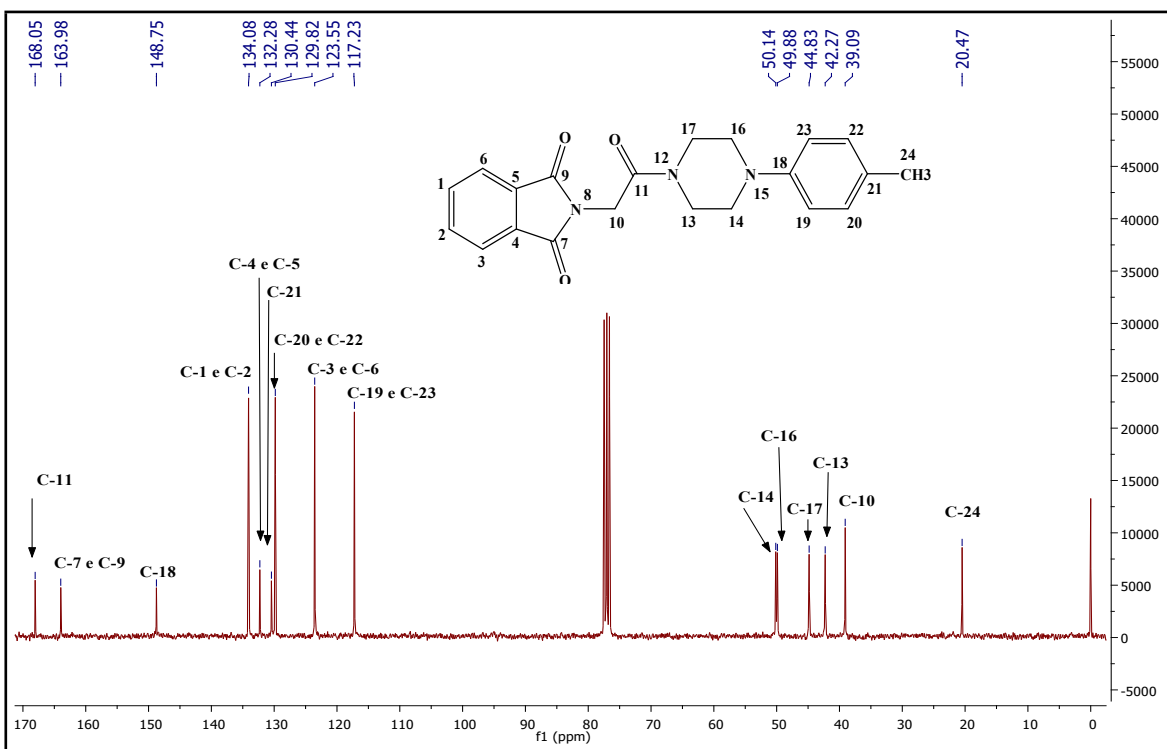

**Figure 7.**  $^{13}\text{C}$  NMR spectra of 2-(2-oxo-2-(4-(p-tolyl)piperazin-1-yl)ethyl)isoindoline-1,3-dione (**3b**) (75 MHz,  $\text{CDCl}_3$ ).

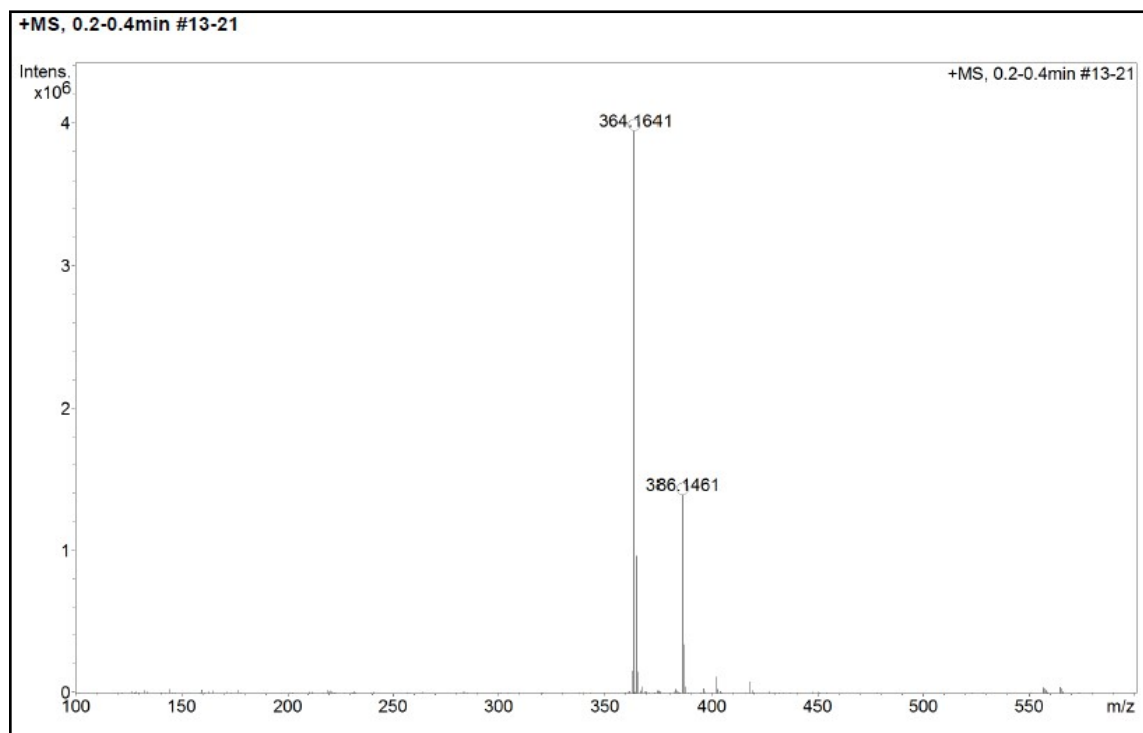

**Figure 8.** HR-MS spectra of 2-(2-oxo-2-(4-(p-tolyl)piperazin-1-yl)ethyl)isoindoline-1,3-dione (**3b**) (ESI-MS).

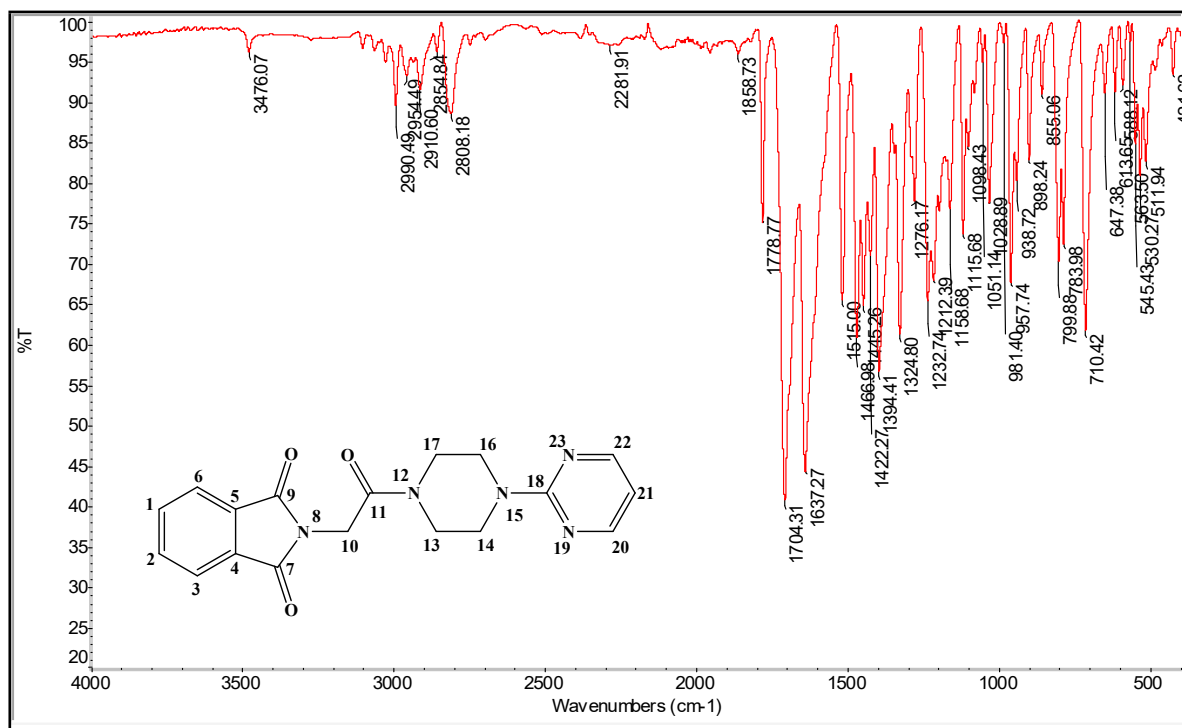

**Figure 9.** Absorption spectra in the infrared region of 2-(2-oxo-2-(4-(pyrimidin-2-yl)piperazin-1-yl)ethyl)isoindoline-1,3-dione (**3c**) (ATR).

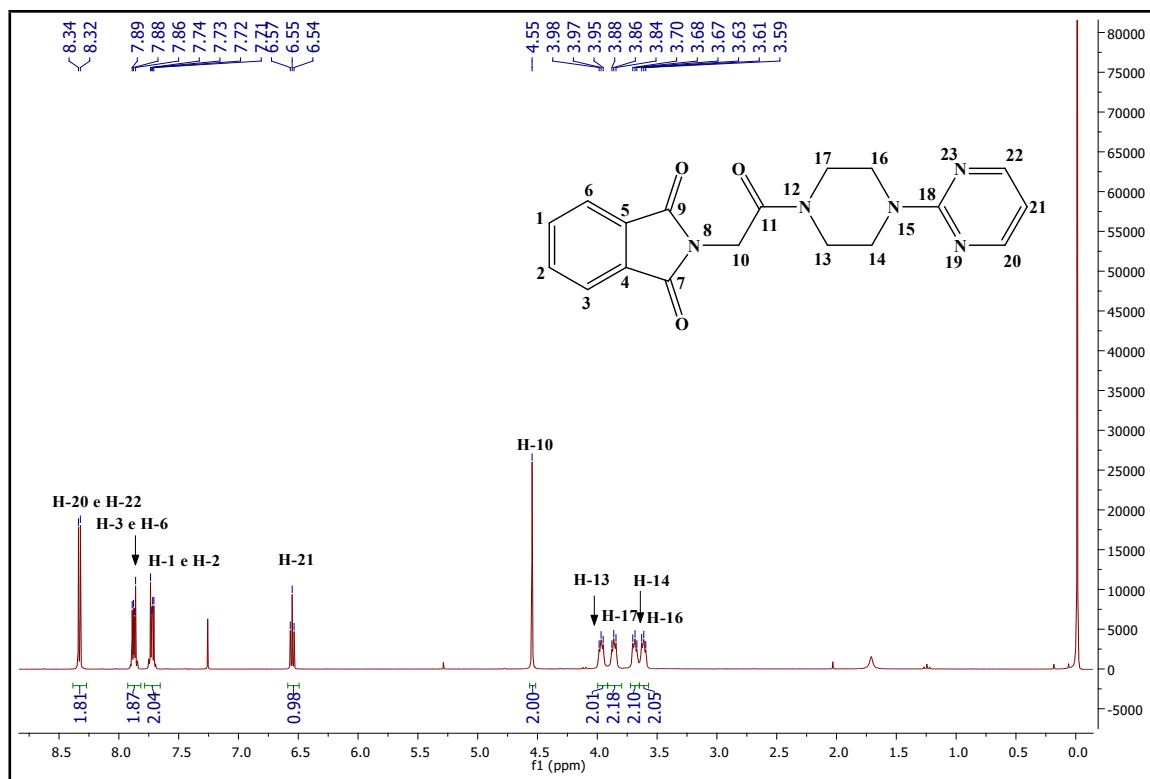

**Figure 10.**  $^1\text{H}$  NMR spectra of 2-(2-oxo-2-(4-(pyrimidin-2-yl)piperazin-1-yl)ethyl)isoindoline-1,3-dione (**3c**) (300 MHz,  $\text{CDCl}_3$ ).

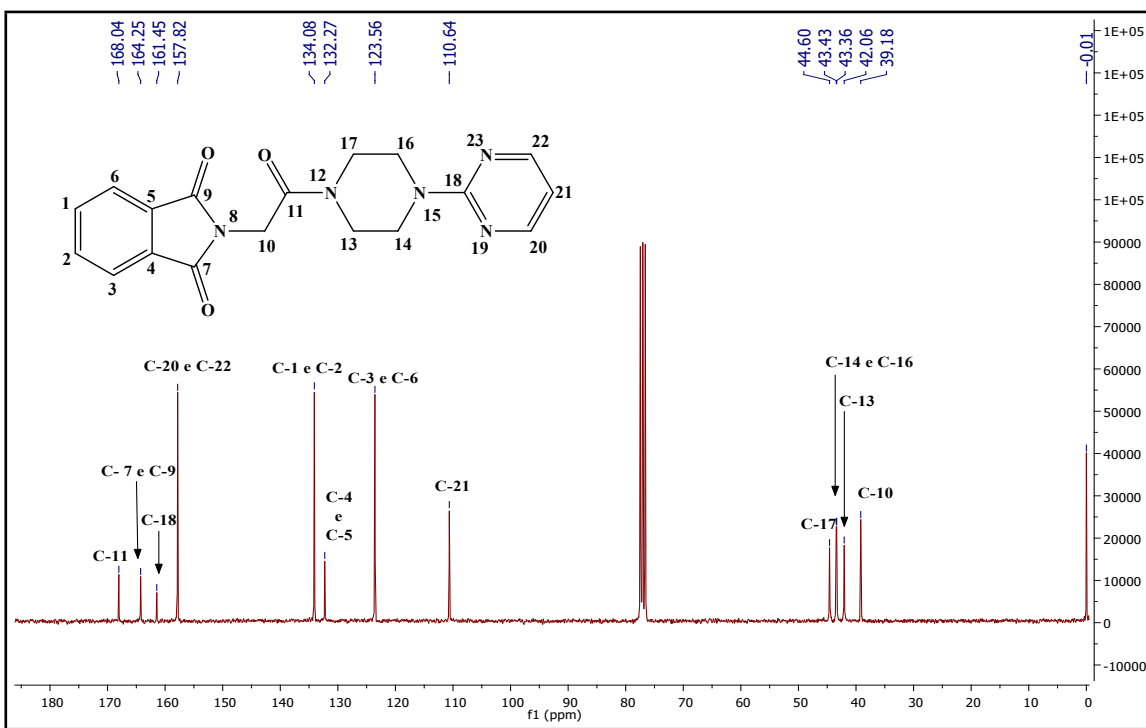

**Figure 11.**  $^{13}\text{C}$  NMR spectra of 2-(2-oxo-2-(4-(pyrimidin-2-yl)piperazin-1-yl)ethyl)isoindoline-1,3-dione (**3c**) (75 MHz,  $\text{CDCl}_3$ ).

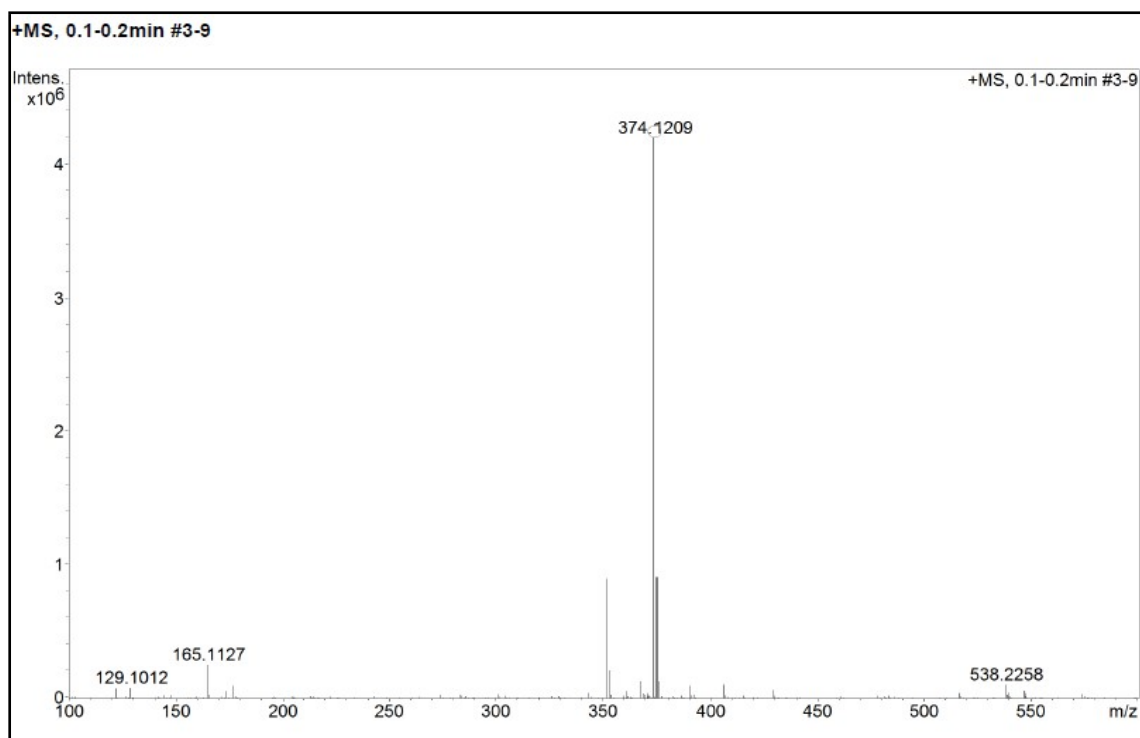

**Figure 12.** HR-MS spectra of 2-(2-oxo-2-(4-(pyrimidin-2-yl)piperazin-1-yl)ethyl)isoindoline-1,3-dione (**3c**) (ESI-MS).

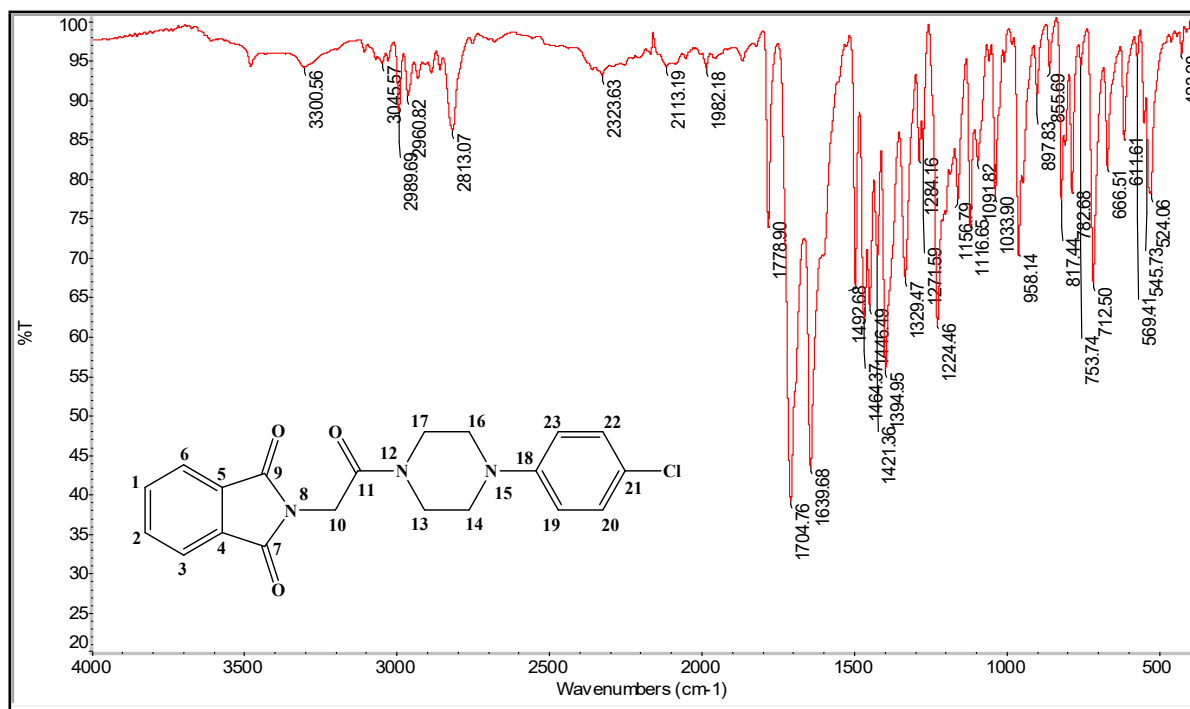

**Figure 13.** Absorption spectra in the infrared region of 2-(2-(4-(4-chlorophenyl)piperazin-1-yl)-2-oxoethyl)isoindoline-1,3-dione (**3d**) (ATR).

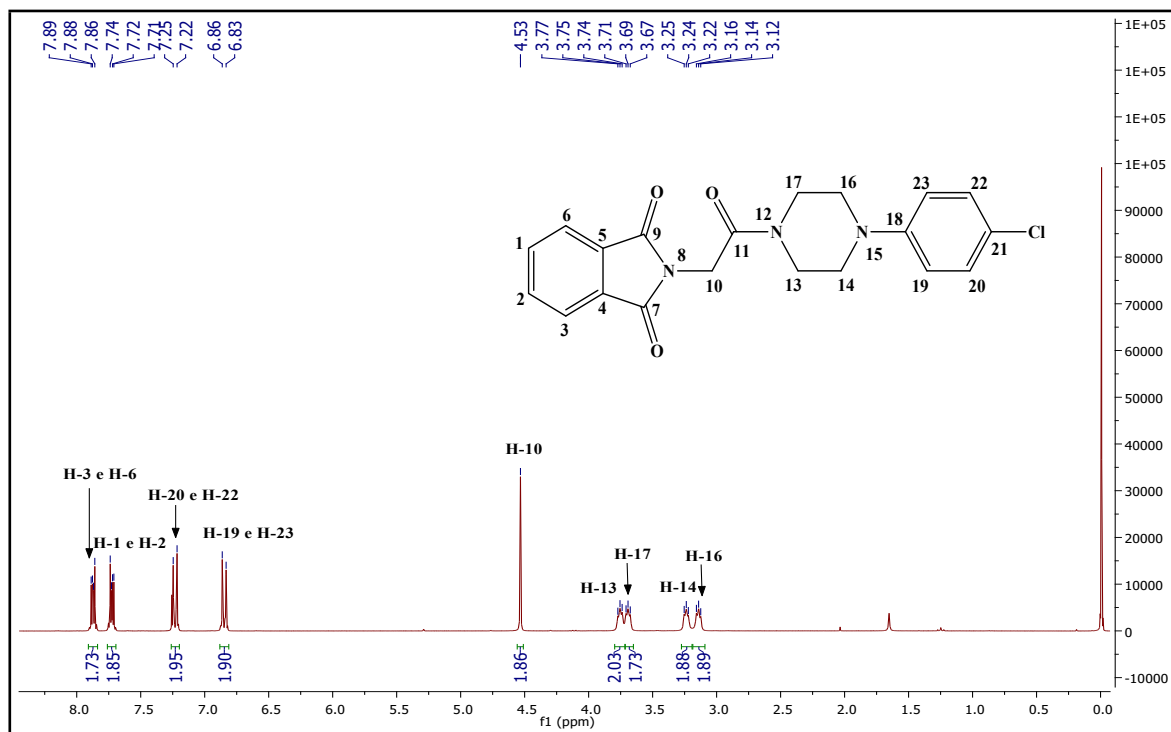

**Figure 14.** <sup>1</sup>H NMR spectra of 2-(2-(4-(4-chlorophenyl)piperazin-1-yl)-2-oxoethyl)isoindoline-1,3-dione (**3d**) (300 MHz, CDCl<sub>3</sub>).



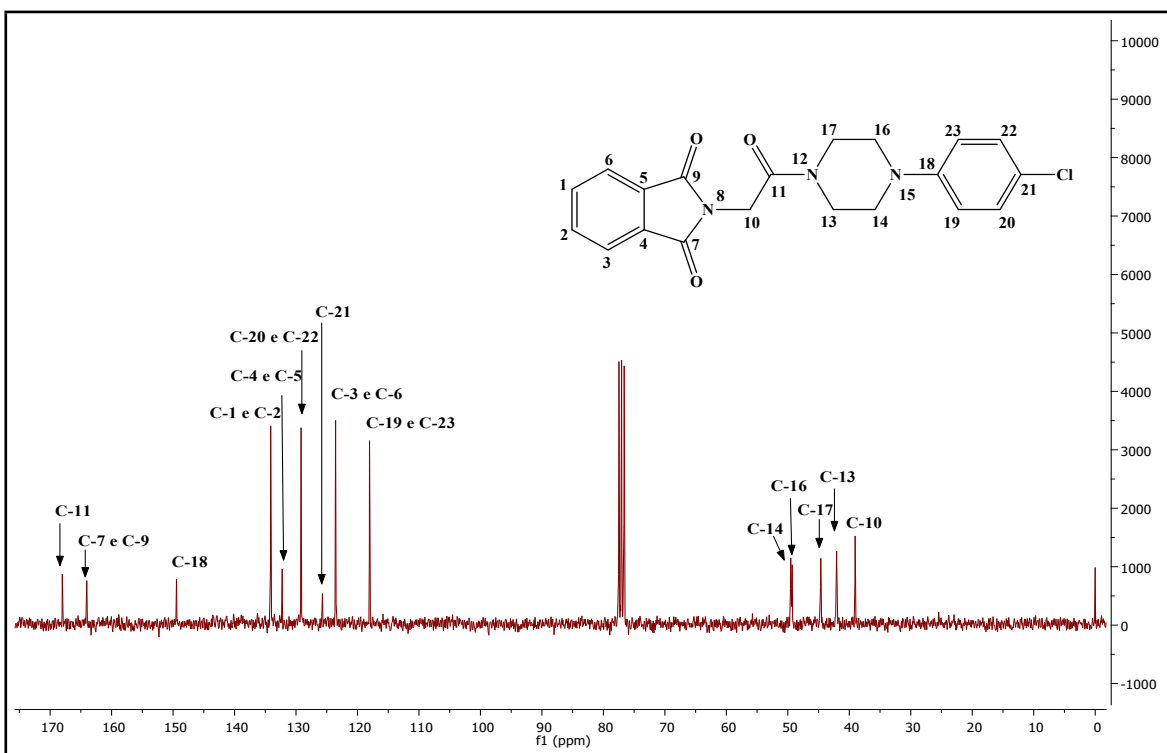

**Figure 15.**  $^{13}\text{C}$  NMR spectra of 2-(2-(4-(4-chlorophenyl)piperazin-1-yl)-2-oxoethyl)isoindoline-1,3-dione (**3d**) (75 MHz,  $\text{CDCl}_3$ ).

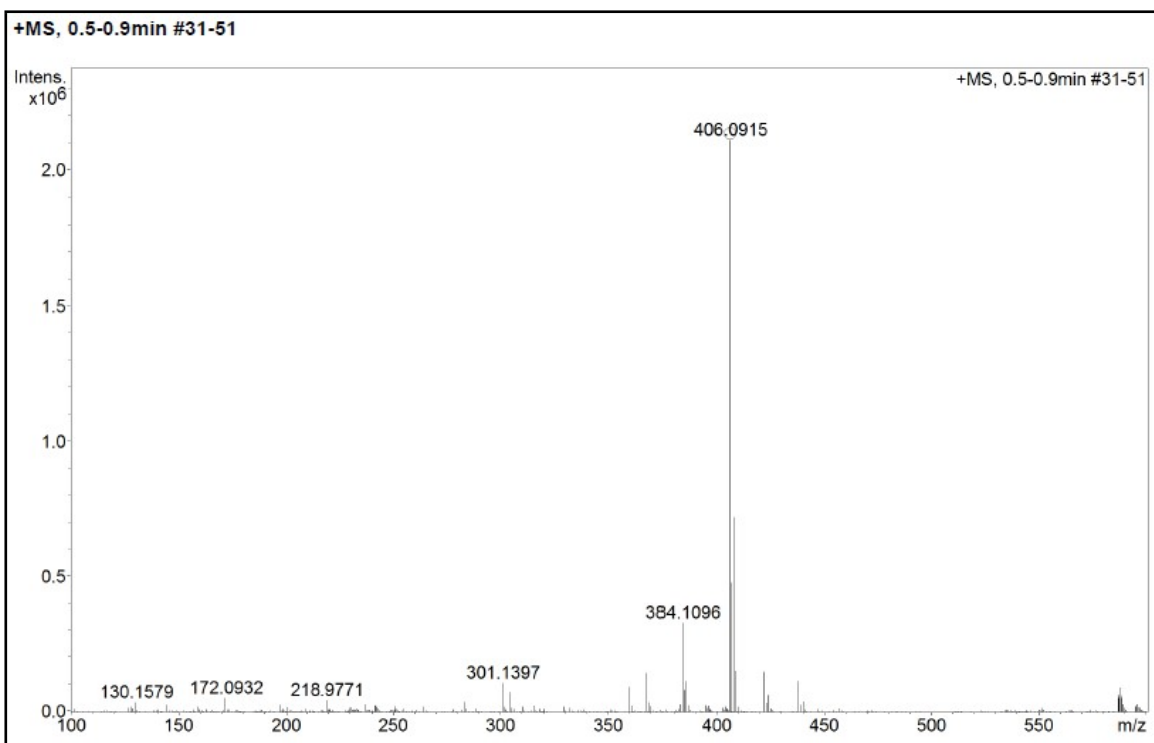

**Figure 16.** HR-MS spectra of 2-(2-(4-(4-chlorophenyl)piperazin-1-yl)-2-oxoethyl)isoindoline-1,3-dione (**3d**) (ESI-MS).

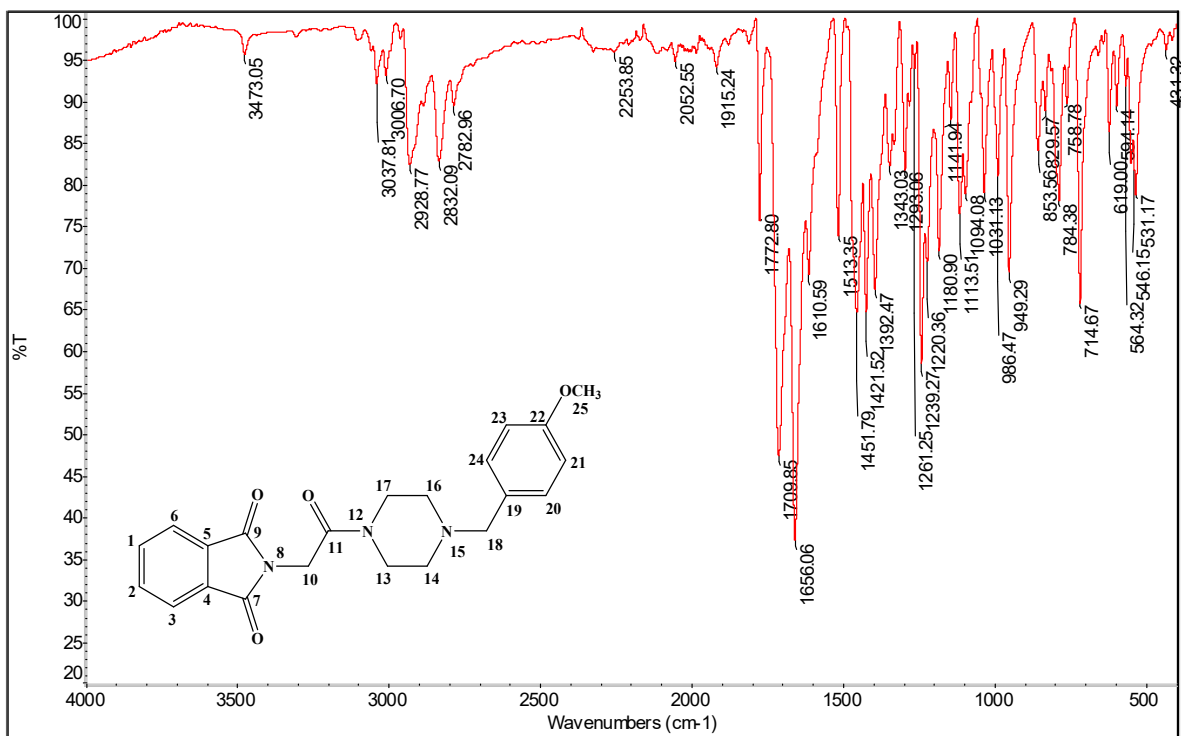

**Figure 17.** Absorption spectra in the infrared region of 2-(2-(4-(4-methoxybenzyl)piperazin-1-yl)-2-oxoethyl)isoindoline-1,3-dione (**3e**) (ATR).

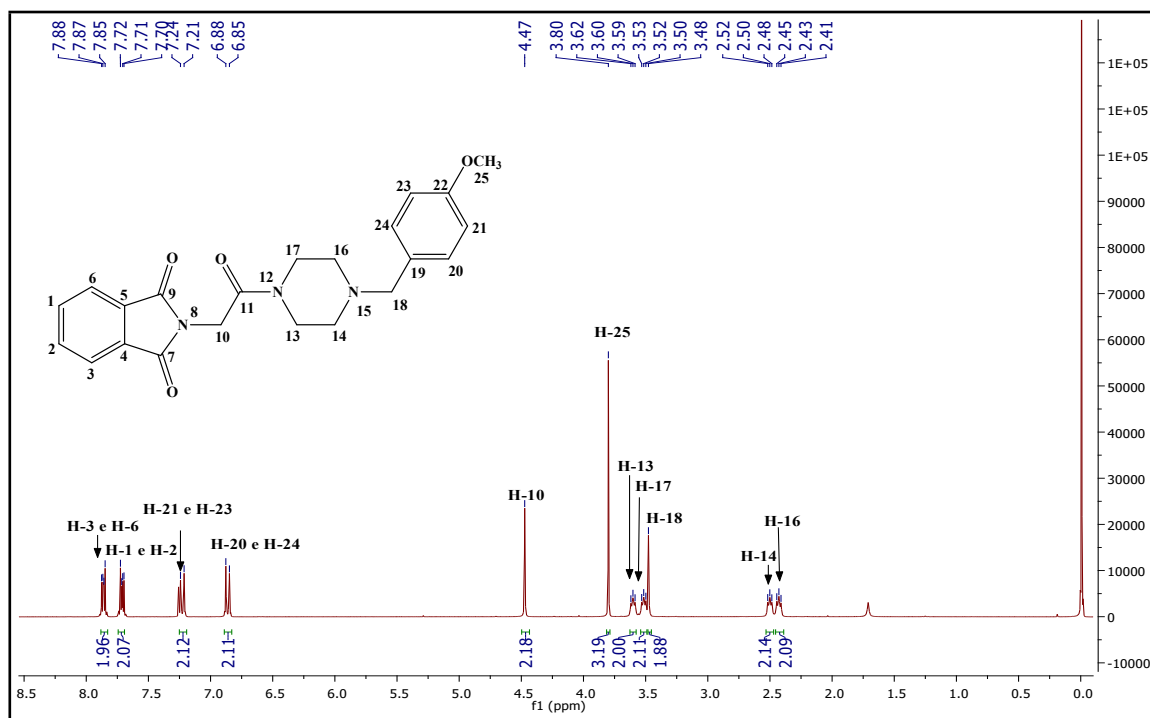

**Figure 18.**  $^1\text{H}$  NMR spectra of 2-(2-(4-(4-methoxybenzyl)piperazin-1-yl)-2-oxoethyl)isoindoline-1,3-dione (**3e**) (300 MHz,  $\text{CDCl}_3$ ).

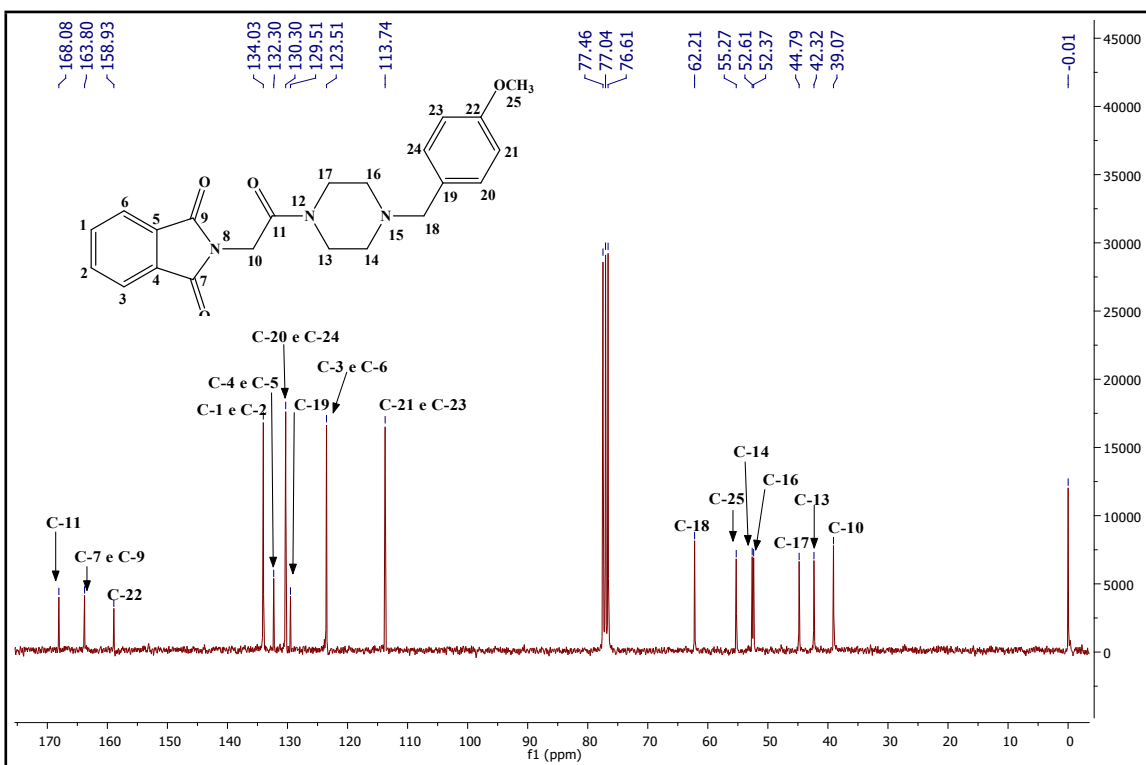

**Figure 19.**  $^{13}\text{C}$  NMR spectra of 2-(2-(4-(4-methoxybenzyl)piperazin-1-yl)-2-oxoethyl)isoindoline-1,3-dione (**3e**) (75 MHz,  $\text{CDCl}_3$ ).

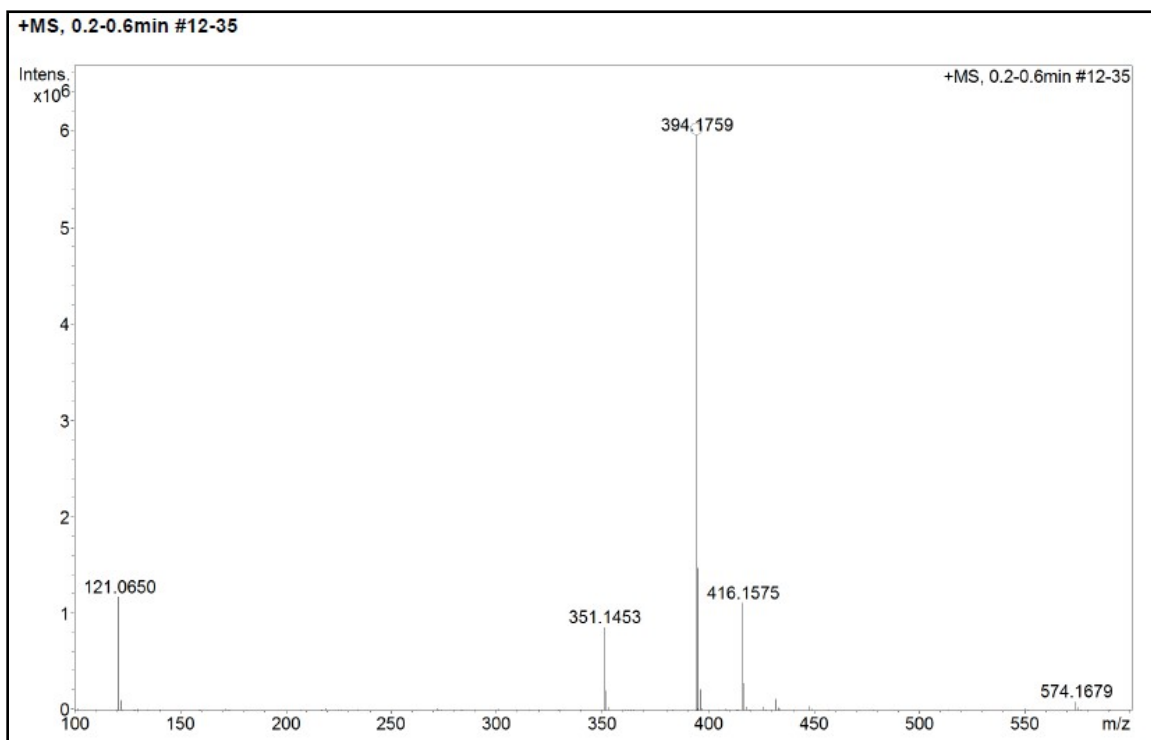

**Figure 20.** HR-MS spectra of 2-(2-(4-(4-methoxybenzyl)piperazin-1-yl)-2-oxoethyl)isoindoline-1,3-dione (**3e**) (ESI-MS).

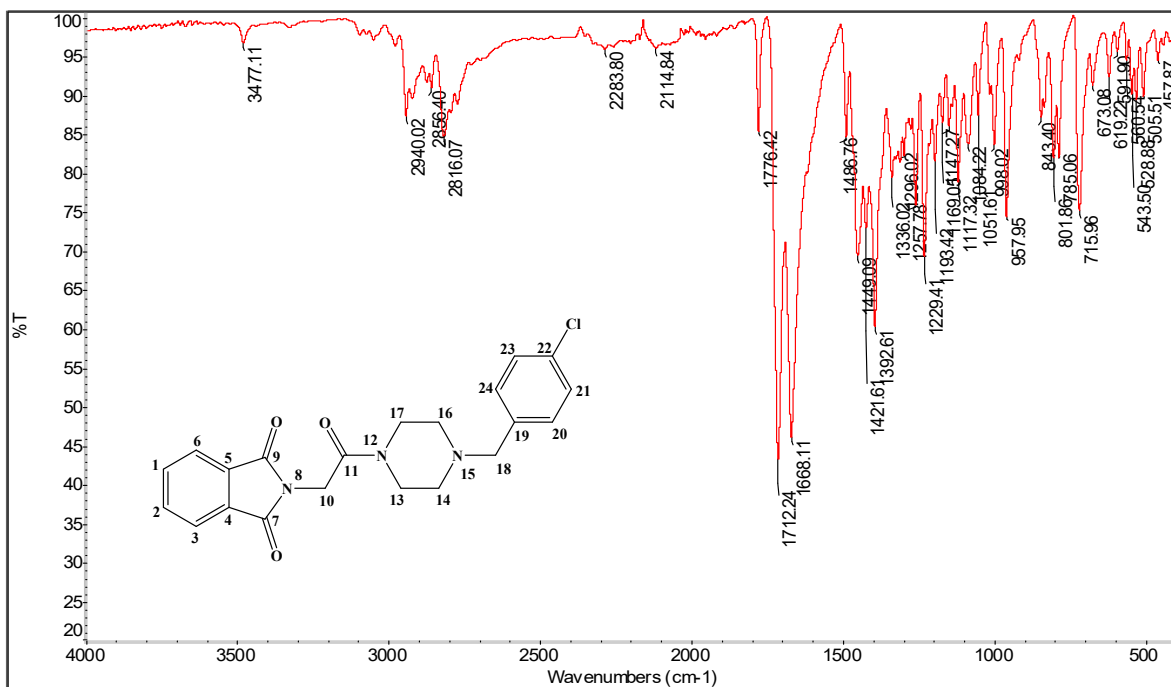

**Figure 21.** Absorption spectra in the infrared region of 2-(2-(4-(4-chlorobenzyl)piperazin-1-yl)-2-oxoethyl)isoindoline-1,3-dione (**3f**) (ATR).

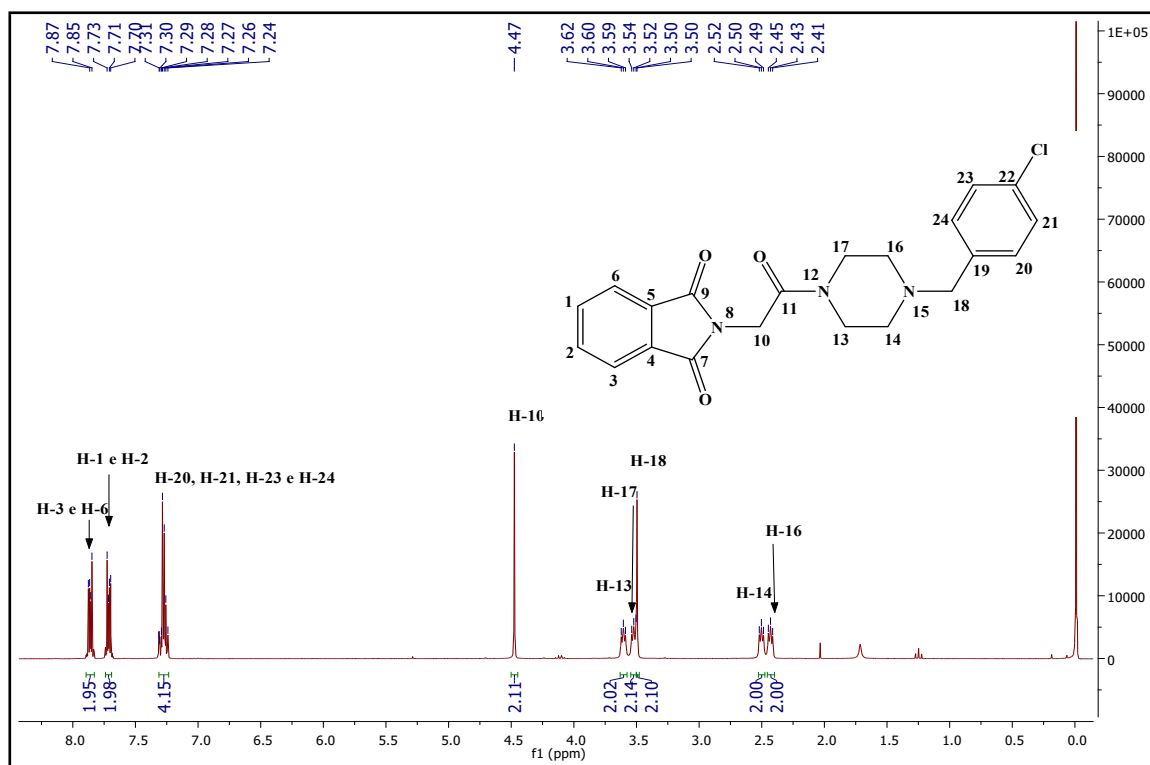

**Figure 22.** <sup>1</sup>H NMR spectra of 2-(2-(4-(4-chlorobenzyl)piperazin-1-yl)-2-oxoethyl)isoindoline-1,3-dione (**3f**) (300 MHz, CDCl<sub>3</sub>).

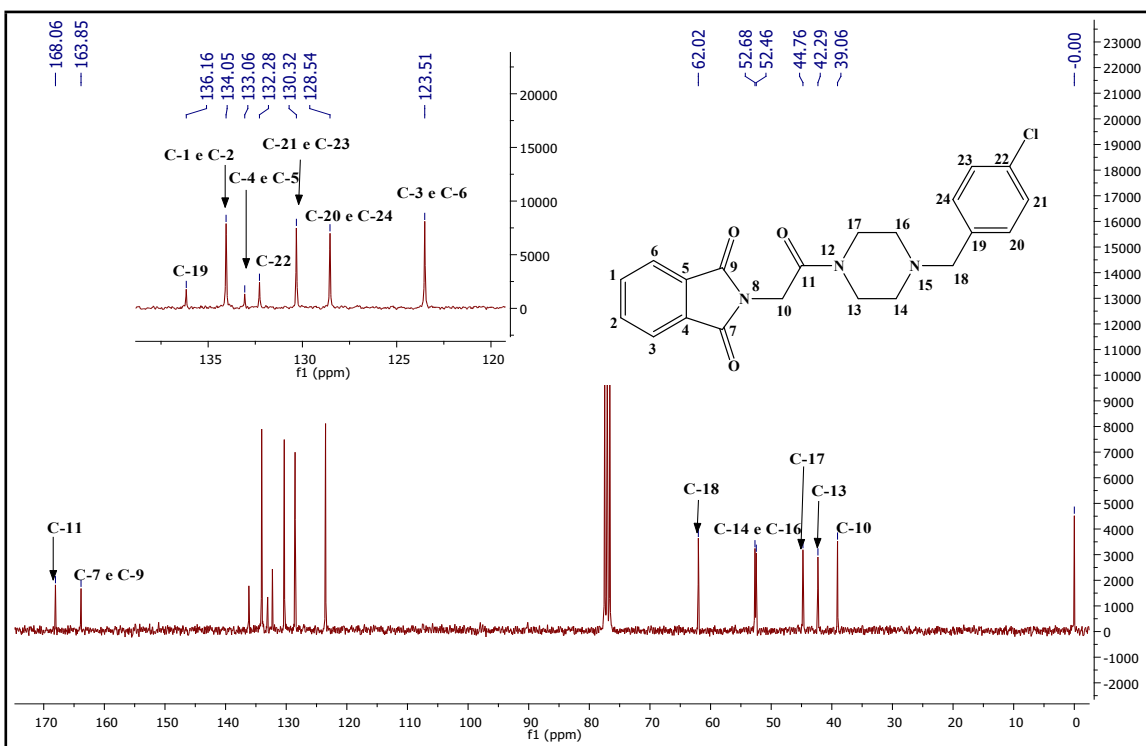

**Figure 23.**  $^{13}\text{C}$  NMR spectra of 2-(2-(4-(4-chlorobenzyl)piperazin-1-yl)-2-oxoethyl)isoindoline-1,3-dione (**3f**) (75 MHz,  $\text{CDCl}_3$ ).

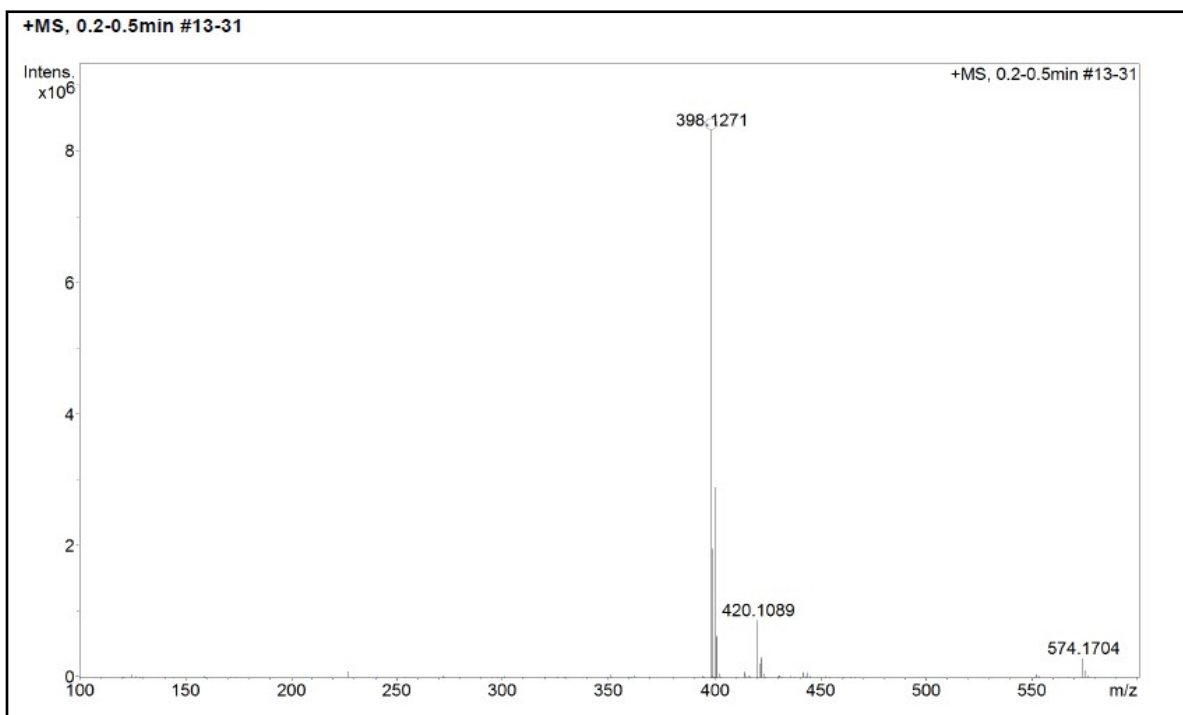

**Figure 24.** HR-MS spectra of 2-(2-(4-(4-chlorobenzyl)piperazin-1-yl)-2-oxoethyl)isoindoline-1,3-dione (**3f**) (ESI-MS).

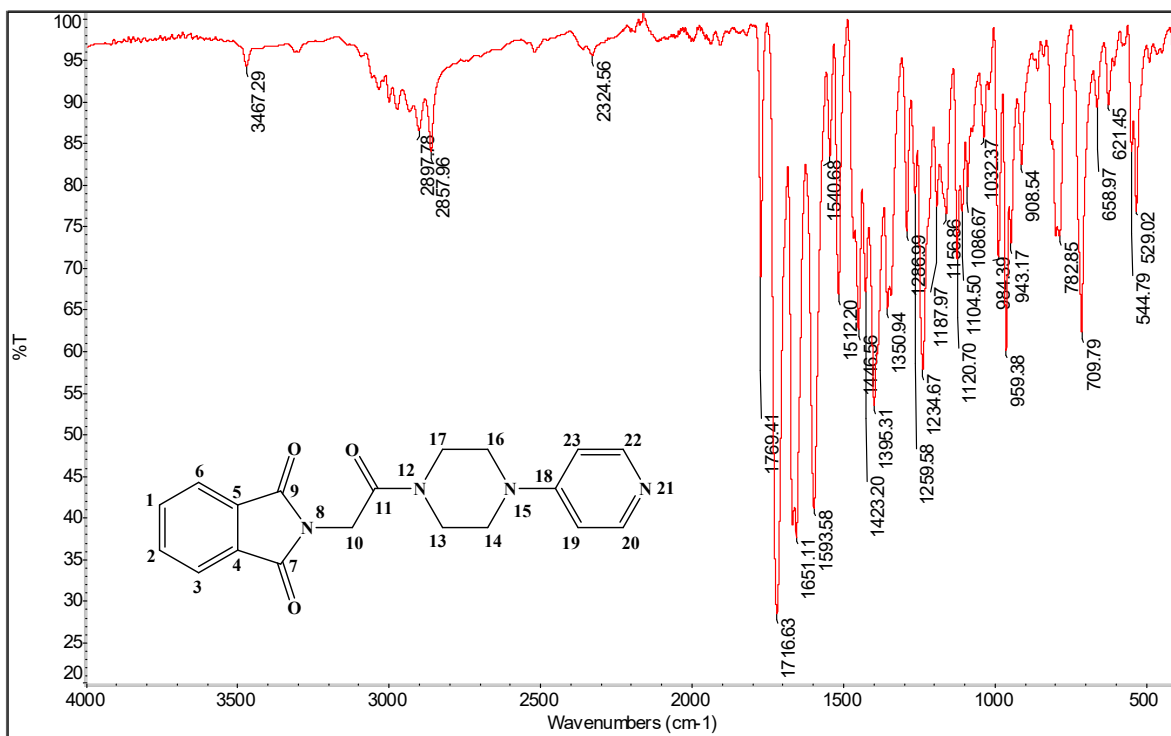

**Figure 25.** Absorption spectra in the infrared region of 2-(2-oxo-2-(4-(pyridin-4-yl)piperazin-1-yl)ethyl)isoindoline-1,3-dione (**3g**) (ATR).

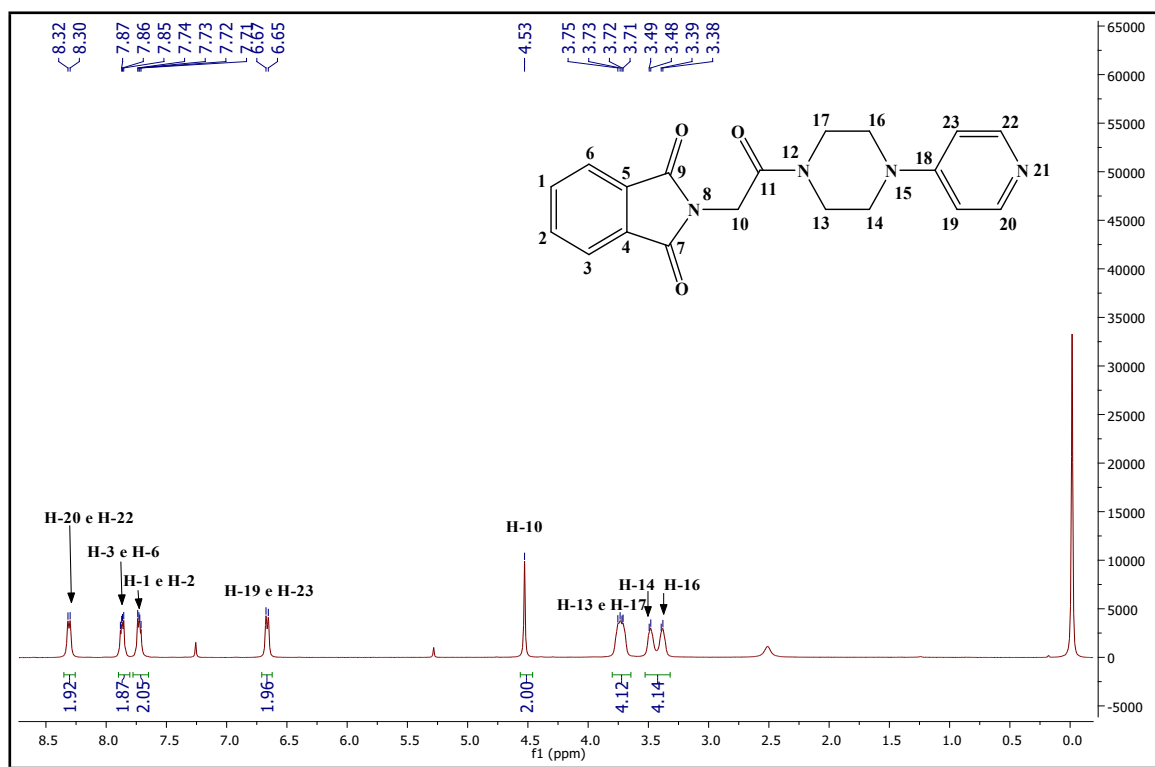

**Figure 26.**  $^1\text{H}$  NMR spectra of 2-(2-oxo-2-(4-(pyridin-4-yl)piperazin-1-yl)ethyl)isoindoline-1,3-dione (**3g**) (300 MHz,  $\text{CDCl}_3$ ).

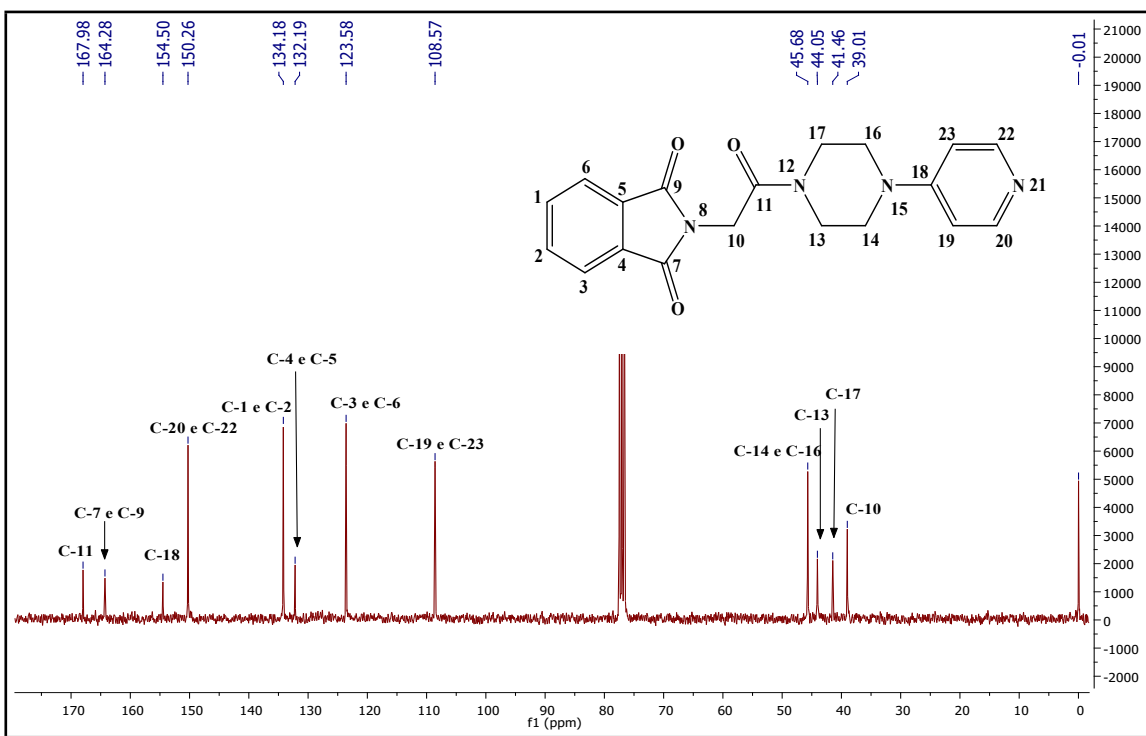

**Figure 27.**  $^{13}\text{C}$  NMR spectra of 2-(2-oxo-2-(4-(pyridin-4-yl)piperazin-1-yl)ethyl)isoindoline-1,3-dione (**3g**) (75 MHz,  $\text{CDCl}_3$ ).

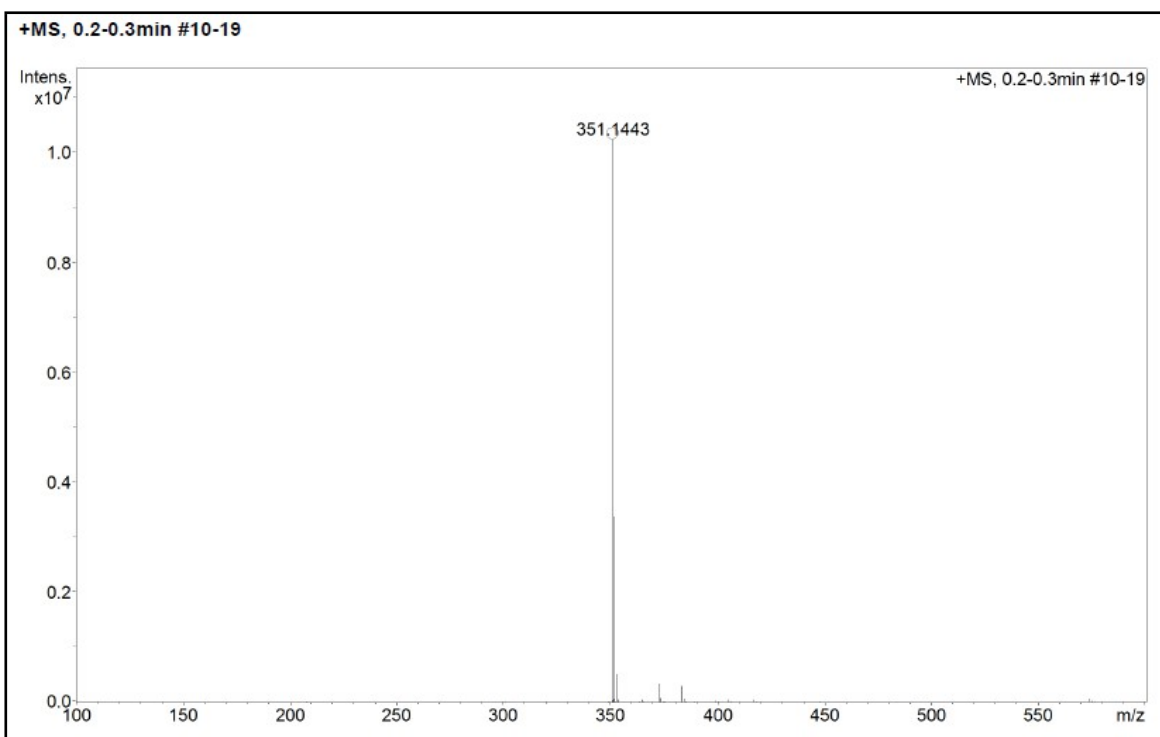

**Figure 28.** HR-MS spectra of 2-(2-oxo-2-(4-(pyridin-4-yl)piperazin-1-yl)ethyl)isoindoline-1,3-dione (**3g**) (ESI-MS).

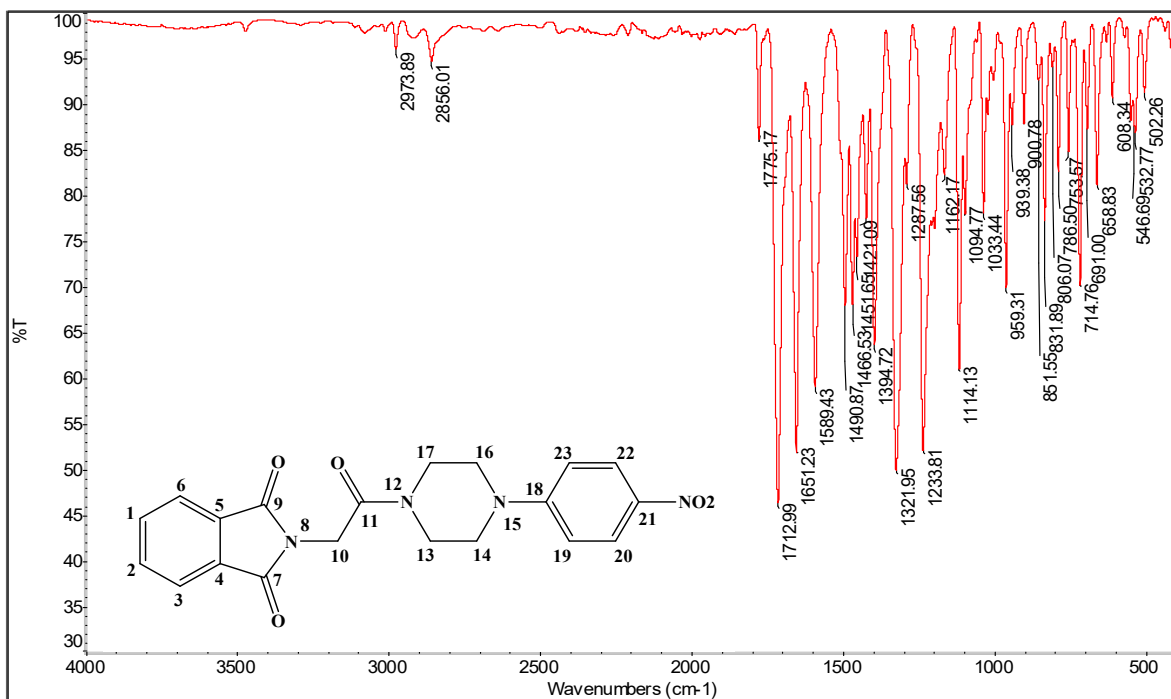

**Figure 29.** Absorption spectra in the infrared region of 2-(2-(4-(4-nitrophenyl)piperazin-1-yl)-2-oxoethyl)isoindoline-1,3-dione (**3h**) (ATR).

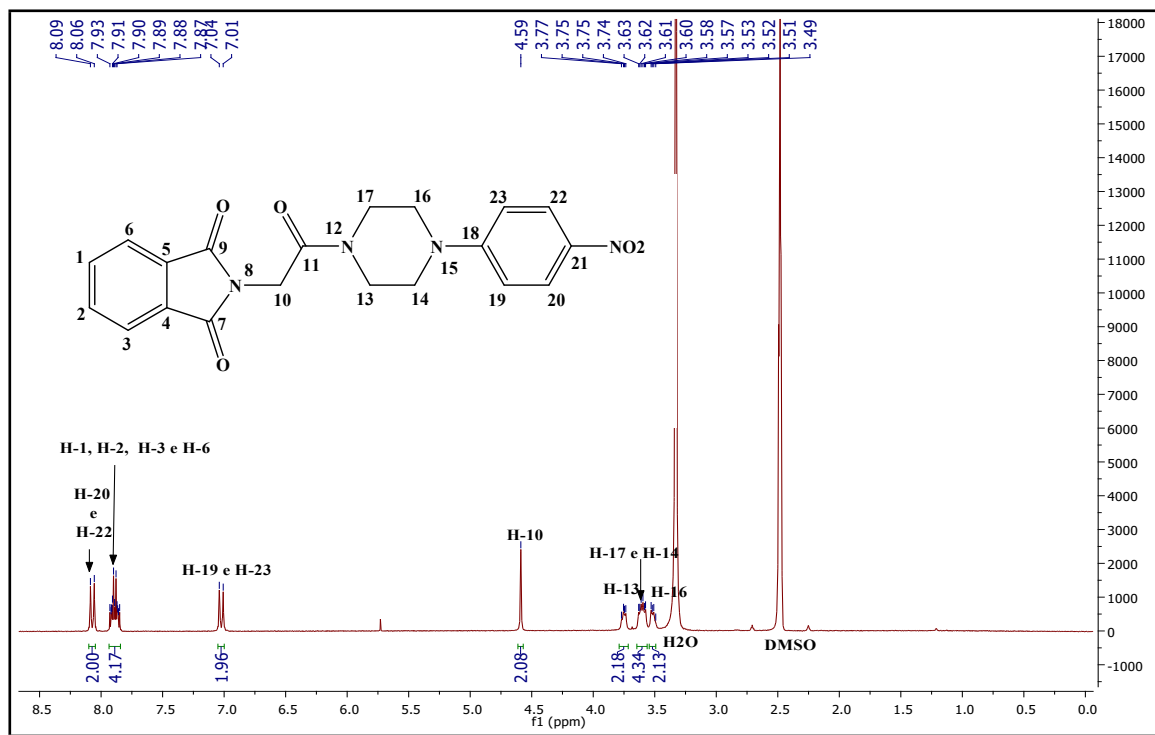

**Figure 30.** <sup>1</sup>H NMR spectra of 2-(2-(4-(4-nitrophenyl)piperazin-1-yl)-2-oxoethyl)isoindoline-1,3-dione (**3h**) (300 MHz, DMSO).



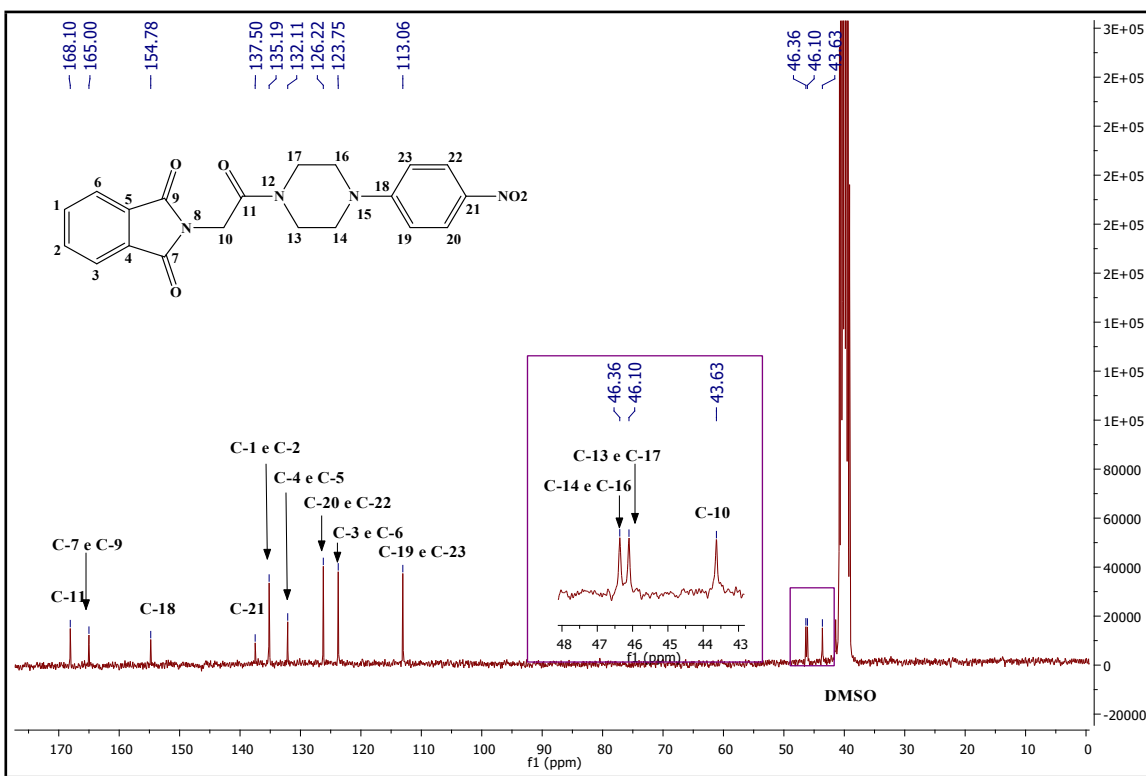

**Figure 31.**  $^{13}\text{C}$  NMR spectra of 2-(2-(4-(4-nitrophenyl)piperazin-1-yl)-2-oxoethyl)isoindoline-1,3-dione (**3h**) (75 MHz, DMSO).

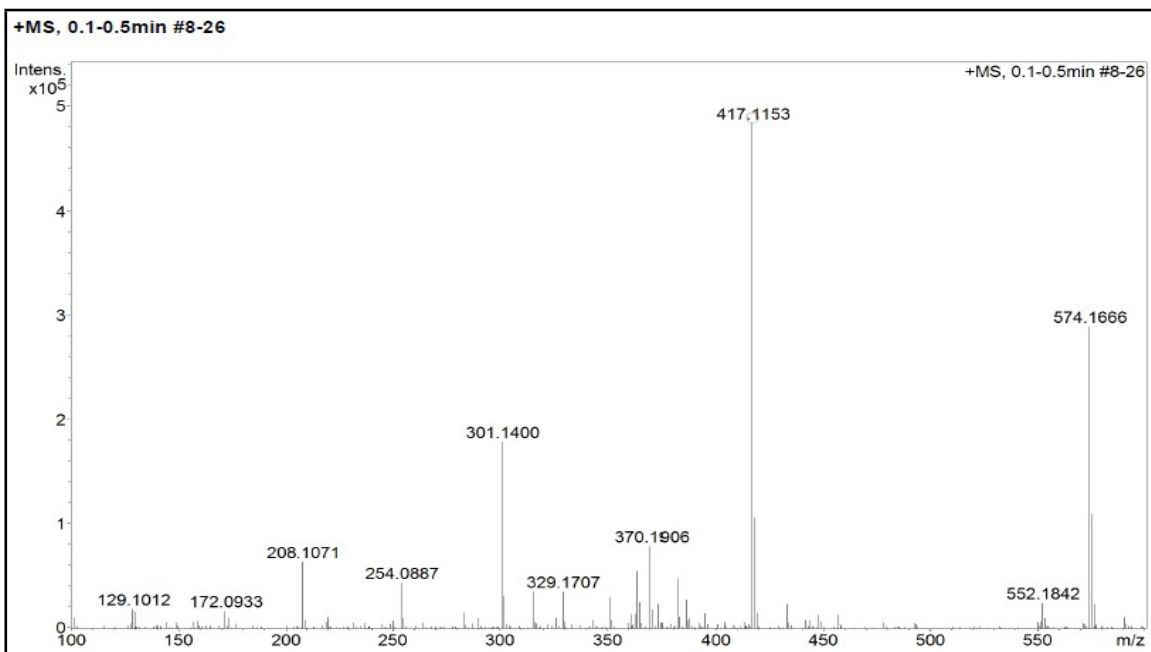

**Figure 32.** HR-MS spectra of 2-(2-(4-(4-nitrophenyl)piperazin-1-yl)-2-oxoethyl)isoindoline-1,3-dione (**3h**) (ESI-MS).

## HPLC Chromatograms of compounds 3a-h

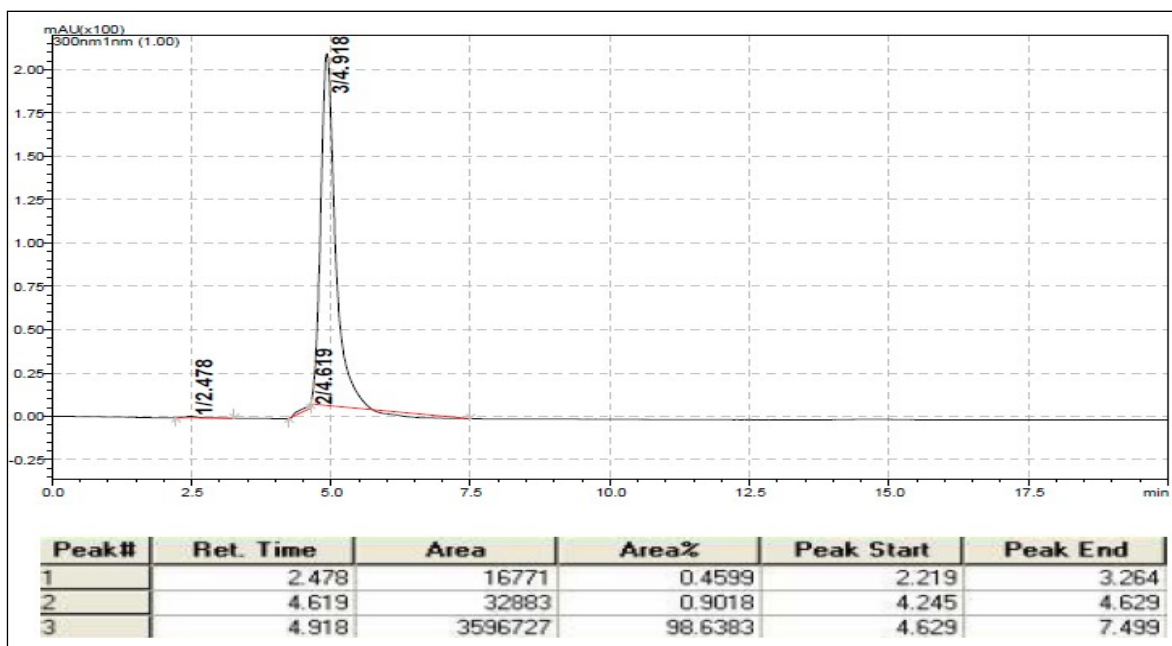

**Figure 33.** HPLC chromatogram of compound 2-(2-(4-(4-bromobenzyl)piperazin-1-yl)-2-oxoethyl)isoindoline-1,3-dione (**3a**).

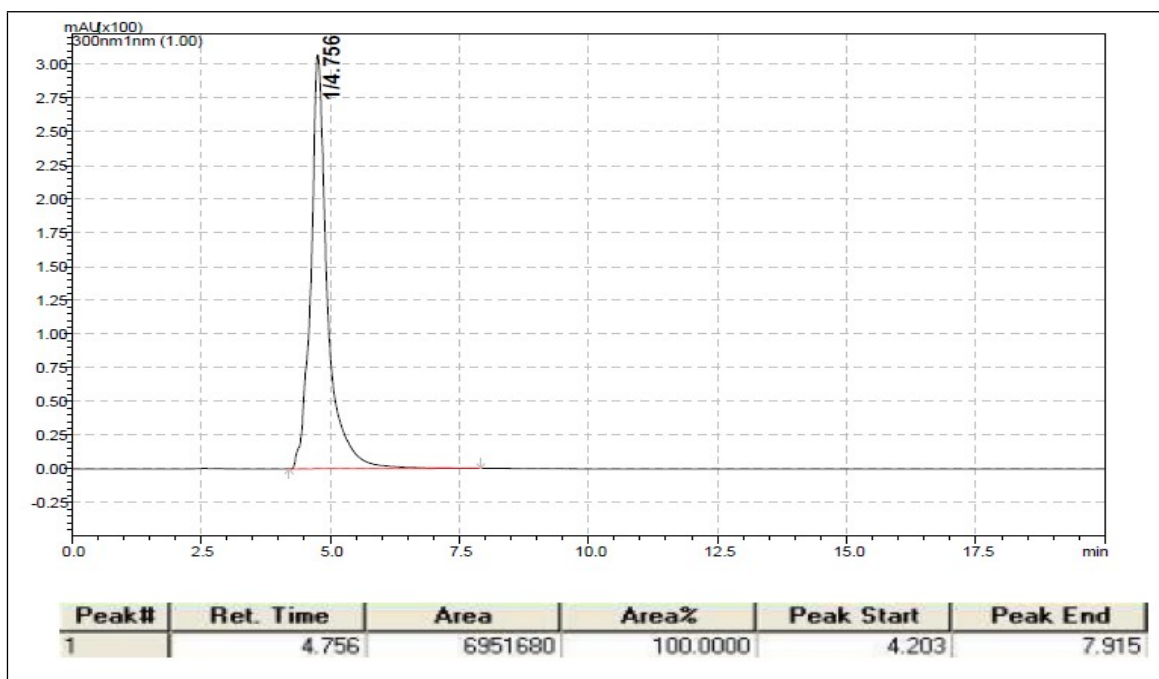

**Figure 34.** HPLC chromatogram of compound 2-(2-oxo-2-(4-(*p*-tolyl)piperazin-1-yl)ethyl)isoindoline-1,3-dione (**3b**).

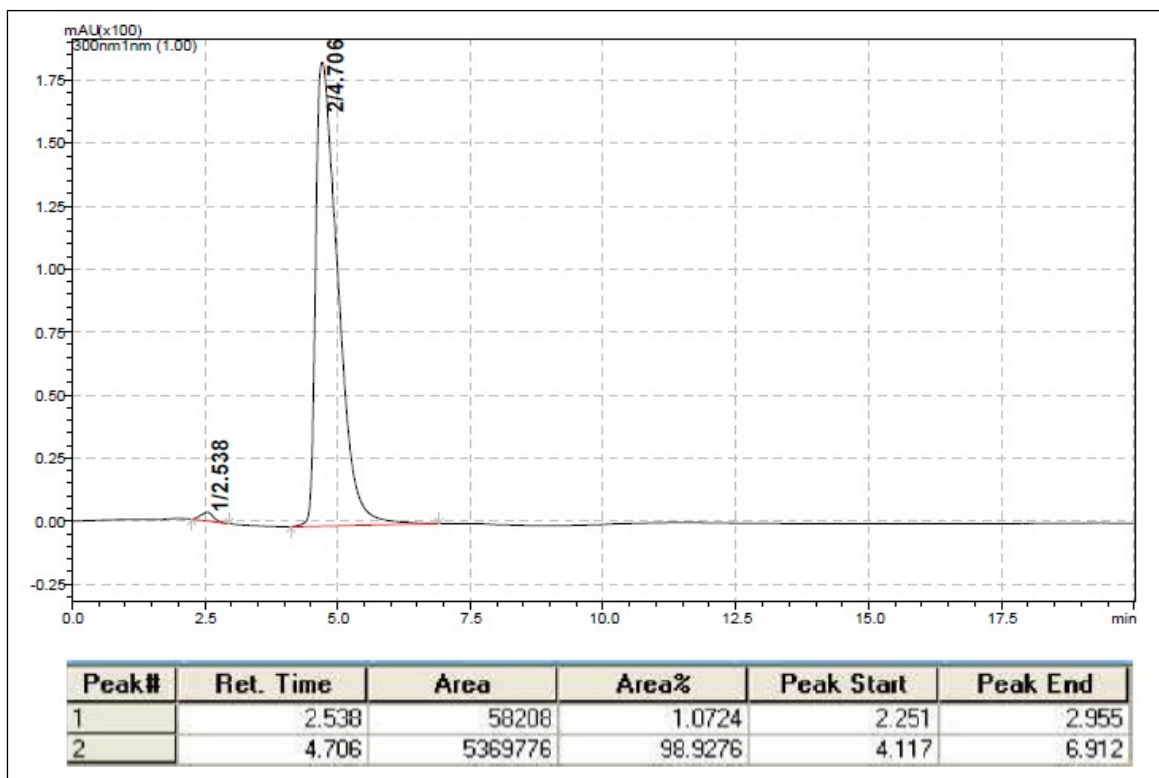

**Figure 35.** HPLC chromatogram of compound *2-(2-oxo-2-(4-(pyrimidin-2-yl)piperazin-1-yl)ethyl)isoindoline-1,3-dione (3c)*.

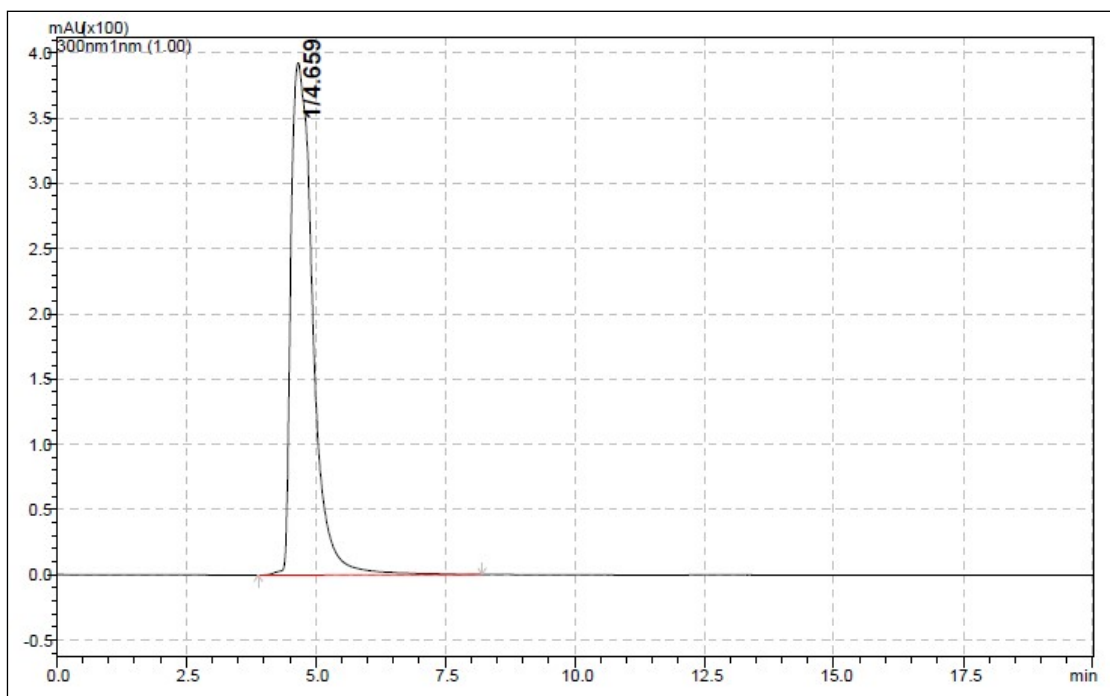

**Figure 36.** HPLC chromatogram of compound *2-(2-(4-(4-chlorophenyl)piperazin-1-yl)-2-oxoethyl)isoindoline-1,3-dione (3d)*.

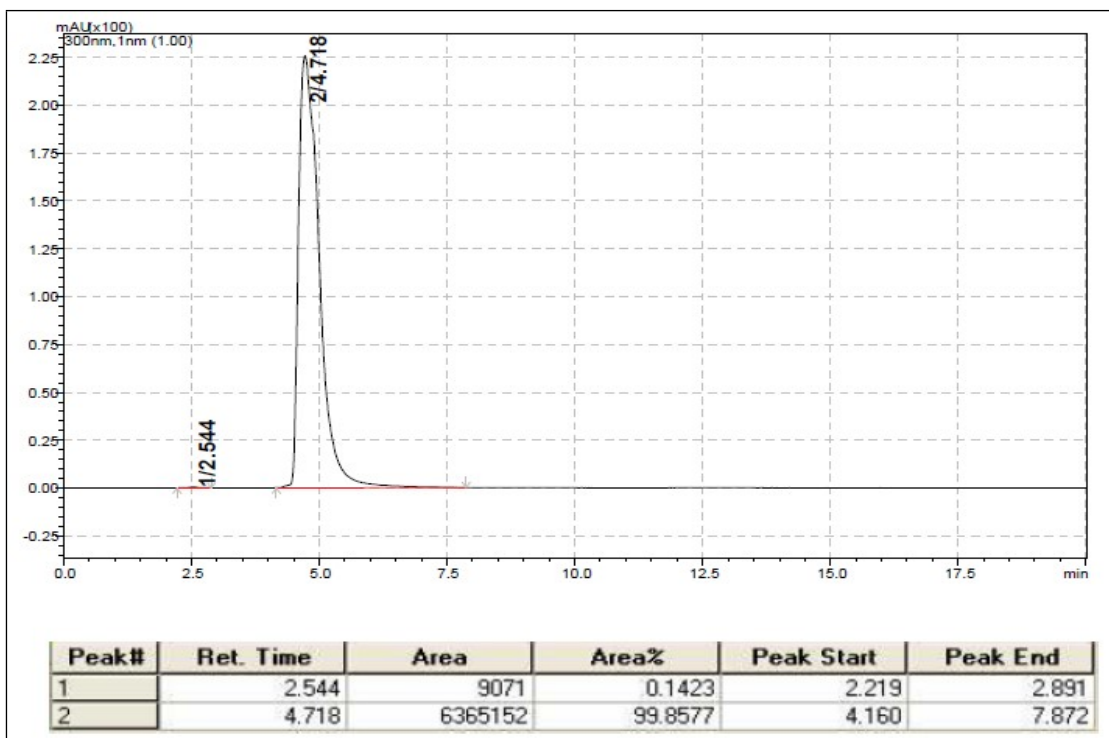

**Figure 37.** HPLC chromatogram of compound *2-(2-(4-(4-methoxybenzyl)piperazin-1-yl)-2-oxoethyl)isoindoline-1,3-dione (3e)*.

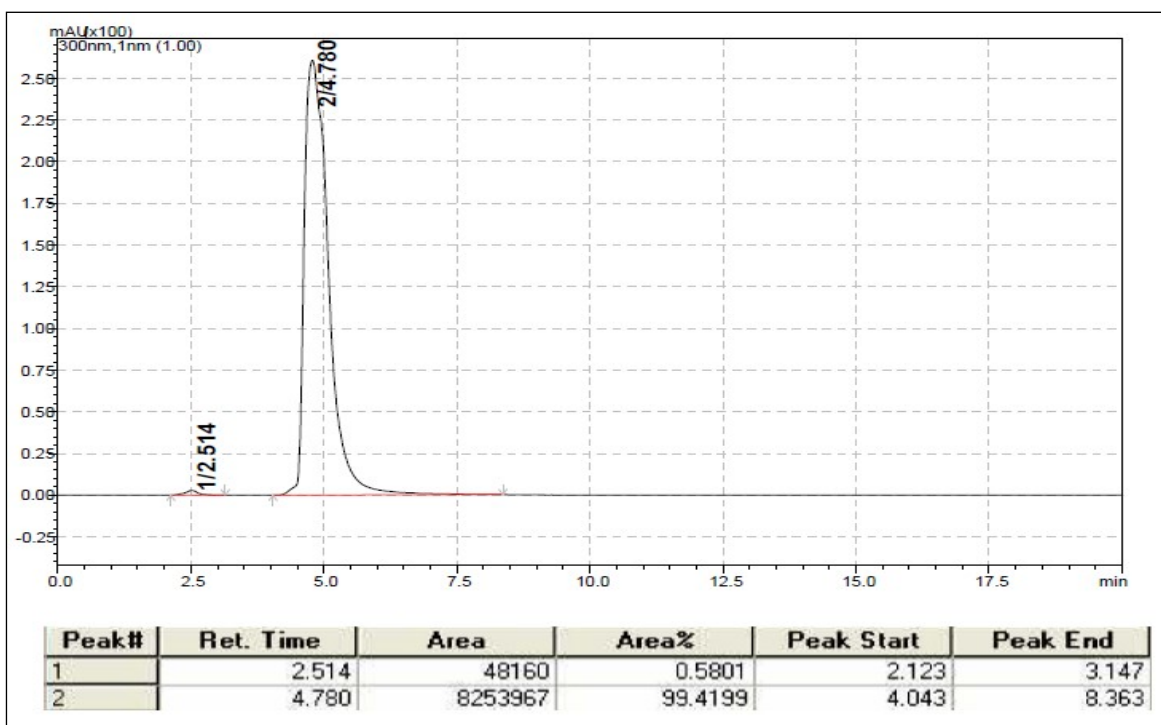

**Figure 38.** HPLC chromatogram of compound *2-(2-(4-(4-chlorobenzyl)piperazin-1-yl)-2-oxoethyl)isoindoline-1,3-dione (3f)*.

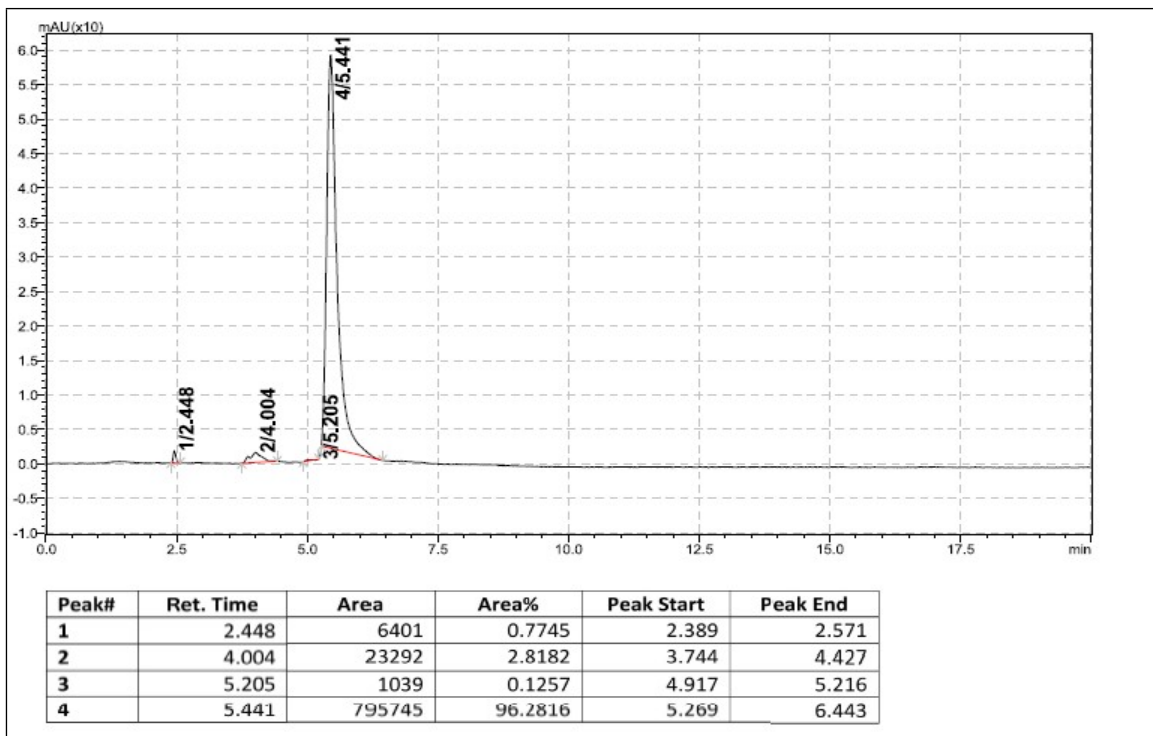

**Figure 39.** HPLC chromatogram of compound 2-(2-oxo-2-(4-(pyridin-4-yl)piperazin-1-yl)ethyl)isoindoline-1,3-dione (**3g**).

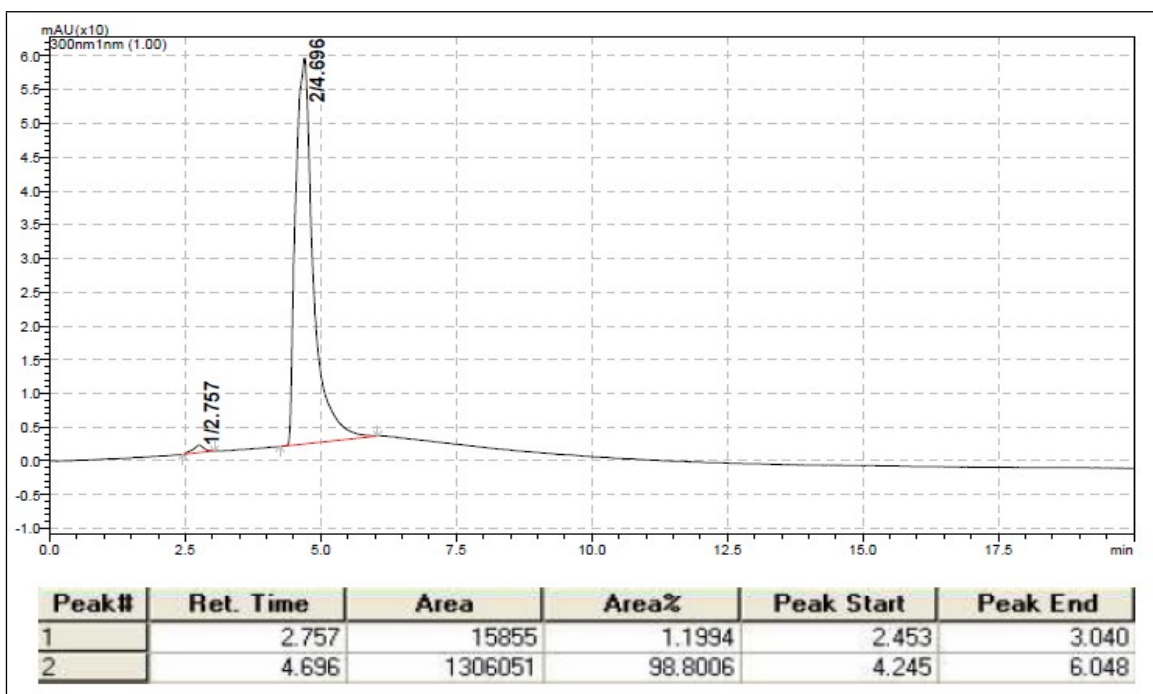

**Figure 40.** HPLC chromatogram of compound 2-(2-(4-(4-nitrophenyl)piperazin-1-yl)-2-oxoethyl)isoindoline-1,3-dione (**3h**).

**. In silico ADME data**

**Table S1.** *In silico* ADME data from QikProp v.3.5 software (Schrödinger) for the most active multitarget lead-compounds and donepezil

| Compound             | Molecular Volume <sup>a</sup> | QPlogPo/w <sup>b</sup> | QPlogS <sup>c</sup> | QPlogHERG <sup>d</sup> | QPlogBB <sup>e</sup> | QPlogKhsa <sup>f</sup> | QPPMDCK <sup>g</sup>  | QPlogKp <sup>h</sup> | CNS <sup>i</sup> | % Absorção oral humano <sup>j</sup> | Human Oral Absorption <sup>k</sup> |
|----------------------|-------------------------------|------------------------|---------------------|------------------------|----------------------|------------------------|-----------------------|----------------------|------------------|-------------------------------------|------------------------------------|
| <b>PQM 183</b>       | 1229,953                      | 2,12                   | -2,935              | -5,602                 | -0,31                | -0,443                 | 240,718               | -4,257               | 1                | 77,158                              | 3                                  |
| <b>PQM 184</b>       | 1174,164                      | 2,41                   | -4,341              | -4,782                 | -0,847               | -0,253                 | 311,285               | -2,566               | -1               | 88,877                              | 3                                  |
| <b>PQM 185</b>       | 1098,222                      | 1,099                  | -2,858              | -4,726                 | -1,036               | -0,874                 | 186,166               | -2,893               | -2               | 77,51                               | 3                                  |
| <b>PQM 186</b>       | 1158,1                        | 2,588                  | -4,498              | -4,783                 | -0,663               | -0,299                 | 767,407               | -2,535               | 0                | 89,921                              | 3                                  |
| <b>PQM 187</b>       | 1253,102                      | 1,603                  | -2,212              | -5,572                 | -0,561               | -0,619                 | 90,962                | -4,185               | 1                | 74,139                              | 3                                  |
| <b>PQM 188</b>       | 1220,948                      | 2,04                   | -2,814              | -5,573                 | -0,318               | -0,469                 | 223,94                | -4,254               | 1                | 76,695                              | 3                                  |
| <b>PQM 189</b>       | 1101,684                      | 1,077                  | -2,822              | -4,66                  | -1,084               | -0,864                 | 160,269               | -3,009               | -2               | 76,299                              | 3                                  |
| <b>PQM 190</b>       | 1189,395                      | 1,345                  | -3,818              | -4,831                 | -1,937               | -0,518                 | 30,981                | -4,275               | -2               | 66,051                              | 3                                  |
| <b>Donepezil</b>     | 1266.695                      | 4,368                  | -4,477              | -6,608                 | 0,189                | 0,569                  | 485,175               | -2,921               |                  | 100                                 | 3                                  |
| Values of reference* | 500.0 – 2000.0                | -2 - 6.5               | -6.5 - 0.5          | < -5 (not good)        | -3 - 1.2             | -1.5 - 1.5             | <25 poor, > 500 great | -8.0 – – 1.0         | -2 - +2          | <25% is Low                         | -1.5 – 1.5                         |

\*VR = gap or recommended value for 95% of known drugs (source: QikProp 3.2 Manual User – Schrödinger Software)

**a:** Total solvent-accessible volume in cubic angstroms using a probe with a 1.4 Å radius

**b:** Predicted octanol/water partition coefficient.

**c:** Predicted aqueous solubility, log S. S in mol dm<sup>-3</sup> is the concentration of the solute in a saturated solution that is in equilibrium with the crystalline solid.

**d:** Predicted IC<sub>50</sub> value for blockage of HERG K<sup>+</sup> channels.

**e:** Predicted brain/blood partition coefficient. Note: QikProp predictions are for orally delivered drugs so, for example, dopamine and serotonin are CNS negative because they are too polar to cross the blood-brain barrier

**f:** Prediction of binding to human serum albumin.

**g:** Predicted apparent MDCK cell permeability in nm/sec. MDCK cells are considered to be a good mimic for the blood-brain barrier. QikProp predictions are for non-active transport

**h:** Predicted skin permeability, log K<sub>p</sub>.

**i:** Predicted central nervous system activity on a -2 (inactive) to +2 (active) scale.

**j:** Predicted human oral absorption on 0 to 100% scale.

**k:** Predicted qualitative human oral absorption: 1, 2, or 3 for low, medium, or high.

## PAMPA BBB assay

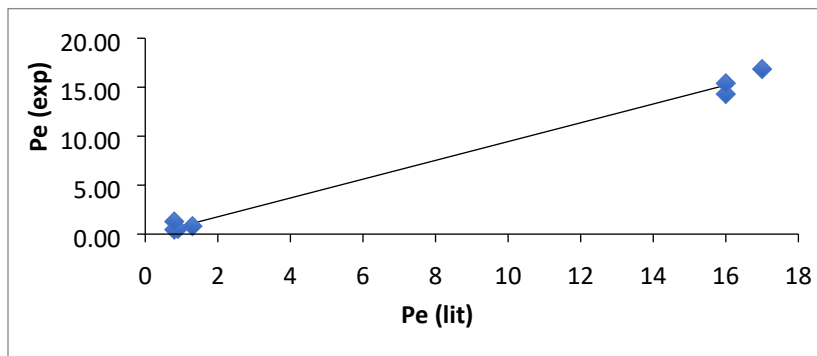

**Figure 41.** Linear correlation between experimental and literature permeability ( $P_e$ ) values. Data represent the mean of triplicates in two different analyzes ( $n=2$ ).

**Table S2.** Permeability coefficient of standard drugs used as control and target compound by the PAMPA-BBB technique. Values of cLog BB and cLog P calculated in silico by the ACD/Percepta Program.

| Compound       | $P_e$ literature ( $10^{-6} \text{ cm s}^{-1}$ ) | $P_e$ experimental ( $10^{-6} \text{ cm s}^{-1}$ ) | Classification | cLog BB      | cLog P      | PSA          |
|----------------|--------------------------------------------------|----------------------------------------------------|----------------|--------------|-------------|--------------|
| Atenolol       | 0,8                                              | 0,46                                               | CNS -          | -            | -           | -            |
| Caffeine       | 1,3                                              | 0,81                                               | CNS -          | -            | -           | -            |
| Diazepam       | 16                                               | 14,30                                              | CNS +          | -            | -           | -            |
| Enoxacin       | 0,9                                              | 0,53                                               | CNS -          | -            | -           | -            |
| Ofloxacin      | 0,8                                              | 1,29                                               | CNS -          | -            | -           | -            |
| Testosterone   | 17                                               | 16,85                                              | CNS +          | -            | -           | -            |
| Verapamil      | 16                                               | 15,40                                              | CNS +          | -            | -           | -            |
| <b>PQM-189</b> | -                                                | <b>13,89</b>                                       | <b>CNS +</b>   | <b>-0,77</b> | <b>2,40</b> | <b>60,93</b> |

## PAMPA BBB assay

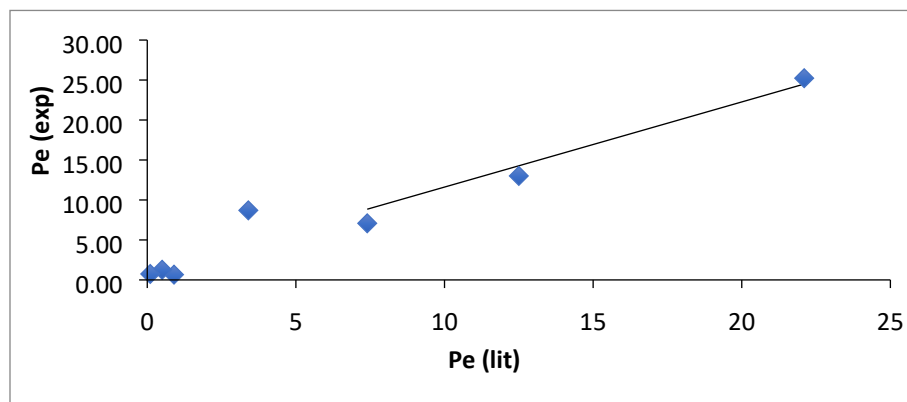

**Figure 42.** Linear correlation between experimental and literature permeability (Pe) values. Data represent the mean of triplicates in two different analyzes (n=2).

**Table S3.** Permeability coefficient of standard drugs, used as control, and target compound by the PAMPA-TGI technique. cLog P values calculated in silico by the ACD/Percepta Program.

| Compound       | Pe literature<br>(10 <sup>-6</sup> cm s <sup>-1</sup> ) | Pe experimental<br>(10 <sup>-6</sup> cm s <sup>-1</sup> ) | Fa (%)       | Classification | cLog P      | PSA          |
|----------------|---------------------------------------------------------|-----------------------------------------------------------|--------------|----------------|-------------|--------------|
| Acyclovir      | 0                                                       | 0,05                                                      | 1,70         | low            | -1,75       | 56,16        |
| Atenolol       | 0                                                       | 0,06                                                      | 2,26         | low            | -1,15       | 75,16        |
| Ceftriaxone    | 0                                                       | 0,01                                                      | 0,37         | low            | -1,41       | 159,08       |
| Coumarin       | 22,1                                                    | 25,23                                                     | 99,99        | low            | 0,51        | 21,63        |
| Diclofenac     | 12,5                                                    | 13,01                                                     | 99,28        | High           | -0,25       | 39,83        |
| Hydrocortisone | 3,4                                                     | 8,70                                                      | 96,34        | high           | 1,99        | 73,98        |
| Norfloxacin    | 0,9                                                     | 0,66                                                      | 22,19        | low            | -1,59       | 61,13        |
| Ranitidine     | 0,5                                                     | 1,27                                                      | 38,29        | medium         | -1,93       | 58,34        |
| Sulfasalazine  | 0,1                                                     | 0,75                                                      | 24,66        | low            | -0,86       | 117,78       |
| Verapamil      | 7,4                                                     | 7,08                                                      | 93,22        | high           | 0,69        | 38,18        |
| <b>PQM-189</b> | -                                                       | <b>3,15</b>                                               | <b>69,80</b> | <b>medium</b>  | <b>2,40</b> | <b>60,93</b> |
